1 ***C. ELEGANS* PEZO-1 IS A MECHANOSENSITIVE CHANNEL INVOLVED IN FOOD SENSATION**

2

3

4

5

6 Jonathan RM Millet<sup>1,2</sup>, Luis O Romero<sup>1,3</sup>, Jungsoo Lee<sup>1</sup>, and Valeria Vásquez<sup>1,\*</sup>.

7

8

9 <sup>1</sup>Department of Physiology, College of Medicine, University of Tennessee Health Science Center,  
10 Memphis, TN 38163, USA

11 <sup>2</sup> Present address: Institute of Neuroscience, Department of Biology, University of Oregon, Eugene,  
12 OR 97403-1254, USA

13 <sup>3</sup> Integrated Biomedical Sciences Graduate Program, College of Graduate Health Sciences,  
14 University of Tennessee Health Science Center, Memphis, TN 38163, USA

15

16

17

18

19

20

21

\*Corresponding Author

22

Valeria Vásquez (VV)

23

Email: [vvasquez@uthsc.edu](mailto:vvasquez@uthsc.edu)

24

25 **ABSTRACT**

26           PIEZO channels are force sensors essential for physiological processes including baroreception  
27 and proprioception. The *Caenorhabditis elegans* genome encodes an ortholog gene of the Piezo  
28 family, *pezo-1*, expressed in several tissues including the pharynx. This myogenic pump is an essential  
29 component of the *C. elegans* alimentary canal whose contraction and relaxation are modulated by  
30 mechanical stimulation elicited by food content. Whether *pezo-1* encodes a mechanosensitive channel  
31 and contributes to pharyngeal function remains unknown. Here, we leverage genome editing, genetics,  
32 microfluidics, and electropharyngeogram recordings to establish that *pezo-1* is expressed in the  
33 pharynx, including a proprioceptive-like neuron, and regulates pharyngeal function. Knockout (KO)  
34 and gain-of-function (GOF) mutants reveal that *pezo-1* is involved in fine-tuning pharyngeal pumping  
35 frequency, sensing osmolarity and food quality. Using pressure-clamp experiments in primary *C.*  
36 *elegans* embryo cultures, we determine that *pezo-1* KO cells do not display mechanosensitive currents,  
37 whereas cells expressing wild-type or GOF PEZO-1 exhibit mechanosensitivity. Moreover, infecting  
38 the *Spodoptera frugiperda* cell line with a baculovirus containing the *pezo-1* isoform G (among the  
39 longest isoforms) demonstrates that *pezo-1* encodes a mechanosensitive channel. Our findings reveal  
40 that *pezo-1* is a mechanosensitive ion channel that regulates food sensation in worms.

41

42

43

## 44 **INTRODUCTION**

45           Mechanosensitive ion channels regulate several physiological processes ranging from osmotic  
46 balance in bacteria (Kung, Martinac and Sukharev, 2010), turgor control in plants (Hamilton, Schlegel  
47 and Haswell, 2015), touch (Geffeney and Goodman, 2012; Yan *et al.*, 2013; Ikeda *et al.*, 2014;  
48 Maksimovic *et al.*, 2014; Ranade *et al.*, 2014; Woo *et al.*, 2014; Chesler *et al.*, 2016), pain (Murthy *et al.*  
49 *et al.*, 2018; Szczot *et al.*, 2018), proprioception (Woo *et al.*, 2015), hearing (Pan *et al.*, 2018), lineage  
50 choice (Pathak *et al.*, 2014), and blood pressure regulation in animals (Retailleau *et al.*, 2015; Wang  
51 *et al.*, 2016; Rode *et al.*, 2017; Zeng *et al.*, 2018). These channels are ubiquitous, as they transduce  
52 mechanical stimuli into electrochemical signals in all kingdoms of life (Kung, Martinac and Sukharev,  
53 2010; Geffeney and Goodman, 2012; Douguet and Honoré, 2019). In 2010, the PIEZO1 and PIEZO2  
54 channels were identified as essential components of distinct, mechanically activated cation channels  
55 in mammalian cells (Coste *et al.*, 2010). Since then, many physiological roles have been assigned to  
56 these two ion channels (Parpaite and Coste, 2017).

57           Mammalian PIEZO channels have been associated with several hereditary pathophysiologies  
58 (Alper, 2017). Piezo1 gain-of-function (GOF) mutations display slow channel inactivation leading to  
59 an increase in cation permeability and subsequent red blood cell dehydration (Zarychanski *et al.*, 2012;  
60 Albuissou *et al.*, 2013; Bae *et al.*, 2013; Ma *et al.*, 2018). For instance, the human Piezo1 hereditary  
61 mutation R2456H located in the pore domain decreases inactivation and, when substituted by Lys  
62 inactivation is completely removed (Bae *et al.*, 2013). Piezo1 global knockouts (KO) are  
63 embryonically lethal in mice (Li *et al.*, 2014; Ranade *et al.*, 2014) and cell-specific KOs result in  
64 animals with severe defects (Wu, Lewis and Grandl, 2017; Ma *et al.*, 2018). Intriguingly, both Piezo2  
65 KO and GOF mutations are associated with joint contractures, skeletal abnormalities and alterations  
66 in muscle tone (Coste *et al.*, 2013; Chesler *et al.*, 2016; Yamaguchi *et al.*, 2019). GOF and loss-of-  
67 function (LOF) mutations are useful genetic tools to determine the contribution of PIEZO channels to  
68 mechanosensation in various physiological processes and in different animals.

69 The *C. elegans* genome encodes an ortholog of the Piezo channel family, namely *pezo-1*  
70 (wormbase.org v. WS280). Recently, Bai and collaborators showed that *pezo-1* is expressed in several  
71 tissues including the pharynx (Bai *et al.*, 2020). The worm's pharynx is a pumping organ that  
72 rhythmically couples muscle contraction and relaxation in a swallowing motion to pass food down to  
73 the animal's intestine (Keane and Avery, 2003). This swallowing motion stems from a constant low-  
74 frequency pumping maintained by pharyngeal muscles and bursts of high-frequency pumping from a  
75 dedicated pharyngeal nervous system (Avery and Horvitz, 1989; Raizen, Lee and Avery, 1995;  
76 Trojanowski, Raizen and Fang-Yen, 2016; Lee *et al.*, 2017). In mammals, the swallowing reflex is  
77 initiated when pressure receptors in the pharynx walls are stimulated by food or liquids, yet the identity  
78 of the receptor(s) that directly evoke this mechanical response remain to be identified (Tsujimura *et*  
79 *al.*, 2019). Interestingly, the *Drosophila melanogaster* PIEZO ortholog is a mechanosensitive ion  
80 channel (Kim *et al.*, 2012) required for feeding while also avoiding food over-consumption (Min *et*  
81 *al.*, 2020; Wang *et al.*, 2020). To date, whether *pezo-1* encodes for a mechanosensitive ion channel or  
82 regulates worm's pharyngeal activity has yet to be determined.

83 Here, we found a strong and diverse expression of the *pezo-1* gene in pharyngeal tissues by  
84 imaging a *pezo-1::GFP* transgenic reporter strain. By leveraging genetic dissection,  
85 electrophysiological measurements, and behavior analyses, we also established that PEZO-1 is  
86 required for proper low frequency electric activity and pumping behavior. Analyses of *pezo-1* KO and  
87 GOF mutants demonstrated that decreasing or increasing PEZO-1 function upregulates pharyngeal  
88 pumping frequency. Likewise, mutants display distinct pharyngeal activities triggered by the  
89 neurotransmitter serotonin or with various buffer osmolarities. By using elongated bacteria as a food  
90 source, we demonstrated that *pezo-1* KO decreases pharyngeal pumping frequency, whereas the GOF  
91 mutant increases it. Finally, electrophysiological recordings of *pezo-1* expressing cells from *C. elegans*  
92 embryo cultures and *Spodoptera frugiperda* (Sf9) cell line demonstrate that *pezo-1* encodes a  
93 mechanosensitive ion channel. Altogether, our results show that *pezo-1* is a mechanosensitive ion  
94 channel involved in a novel biological function regulating pharyngeal pumping and food sensation.

## 95 **MATERIALS AND METHODS**

### 96 **Strains and Maintenance**

97 Worms were propagated as previously described (Brenner, 1974). N2 (var. Bristol) was  
98 referred as wild type (WT) throughout the manuscript. The following strains were used: VVR3  
99 *unc119(ed3)III;decEx1(pRedFlpHgr)(C10C5.1[20789]::S0001\_pR6K\_Amp\_2xTY1ce\_EGFP\_FRT\_  
100 rpsl\_neo\_FRT\_3xFlag)dFRT::unc-119-Nat*, COP1553 (KO: 6,616 bp deletion) *pezo-1 (knu508) IV*,  
101 COP1524 (GOF: R2373K) *pezo-1 (knu490) IV*, LX960 *lin-15B&lin-15A(n765) X; vsIs97 [tph-  
102 lp::DsRed2 + lin-15(+)]*, DA572 *eat-4(ad572) III*, and DA1051 *avr-15(ad1051) V*. Transgenic strain  
103 VVR3 was obtained by microinjecting a fosmid construct (from the TransgeneOme Project) in a *unc-  
104 119(ed3)* strain from InVivo Biosystems. COP1553 and COP1524 were obtained using the CRISPR-  
105 Cas9 method (InVivo Biosystems). Transgenic worm VVR3 expressing GFP under the control of  
106 *Ppezo-1::GFP* was crossed with *pezo-1* mutants COP1553 and COP1524 to obtain VVR69 and  
107 VVR70, respectively. LX960 was kindly provided by Dr. Kevin Collins (University of Miami).

### 108 **Imaging**

109 Worms were selected individually and dropped in 15 µL of M9 buffer (86 mM NaCl, 42 mM  
110 Na<sub>2</sub>HPO<sub>4</sub>, 22 mM KH<sub>2</sub>PO<sub>4</sub>, 1mM MgSO<sub>4</sub>) paralyzed on a glass slide containing 2% agarose pads  
111 containing 150 mM 2,3-butanedione monoxime (BDM). Bright field and fluorescence imaging were  
112 done on a Zeiss 710 Confocal microscope using either a 20X or 40X objective. Images were processed  
113 using Fiji ImageJ (Schindelin *et al.*, 2009) to enhance contrast and convert to an appropriate format.

### 114 **Worms' synchronization**

115 For all pharyngeal pumping assays, worms were synchronized by picking young adults onto  
116 fresh nematode growth media (NGM) plates seeded with *E coli* strain OP50 and left to lay eggs for  
117 two hours at 20°C. Then, the adults were removed, and the plates incubated at 20°C for three days.

## 118 **Pharyngeal pumping**

119 *Serotonin profile.* A serotonin aliquot (InVivo Biosystems) was diluted in M9 Buffer prior to  
120 experiments and discarded after three hours. 42 synchronized worms were picked and transferred in  
121 200  $\mu$ L of M9 Buffer supplemented with 2-, 5-, 10- or 20-mM serotonin and incubated at 20°C for 30  
122 minutes before being loaded inside the microfluidic chip (SC40, The ScreenChip™ System, InVivo  
123 Biosystems).

124 *Control E. coli assay.* OP50 was grown in liquid LB medium under sterile conditions at 37°C  
125 and diluted to an optical density of 1.0. Bacterial cultures were stored at 4°C for up to a week.

126 *Spaghetti-like E. coli assay.* OP50 colonies were picked from a fresh LB plate and incubated  
127 in 2 mL of LB overnight the day before the experiment. The following day, 0.5 mL of the pre-  
128 incubation culture was used to inoculate 1.5 mL of LB media and grown until growth was exponential,  
129 which was verified by checking optical density (optical density of 0.5). Cephalixin (Alfa Aesar™)  
130 was then added at 60  $\mu$ g/ml final concentration and the culture was incubated for two hours. Spaghetti-  
131 like OP50 were verified under a microscope and washed three times using 2 mL of M9 buffer followed  
132 by centrifugation at 400 g to gently pelletize the elongated bacteria.

133 *Pharyngeal recordings and Analyses.* Worms were loaded one-by-one inside the microfluidic  
134 chip recording channel and left to adjust for one minute prior to recording. All recordings were two  
135 minutes long. Records were analysed using NemAnalysis software (InVivo Biosystems) with the brute  
136 force algorithm turned off. Parameters were adjusted for each record in order to include the maximum  
137 numbers of clearly identifiable pharyngeal pumps. Results were exported from the software in sheet  
138 form and parameters were plotted and statistically analysed using MATLAB R2019a (MathWorks).

## 139 **Development assay**

140 Young adults were allowed to lay eggs on NGM plates seeded with control or spaghetti-like  
141 bacteria for two hours. Spaghetti-like bacteria were cultured as described above. Animals (10-20

142 worms) were removed for plates after two hours and the number of eggs laid was counted. After 3  
143 days of incubation, animals that reached adulthood were counted in each trial, and results were  
144 compared across four trials.

#### 145 **Food ingestion assay**

146 A drop of fresh cultured of control or spaghetti-like bacteria with 2  $\mu$ M DiI dye (Sigma, CAS  
147 #41085-99-8) was placed on a NGM agar plate. Young adults were fed bacteria with DiI for 30 min.  
148 Worms were transferred into OP50 seeded NGM without dye for 5 min (Vidal-Gadea *et al.*, 2012).  
149 Animals were placed in a thin-layered BDM-agarose plate for imaging under a Nikon SMZ18  
150 stereomicroscope. Food occupation in the digestive tract was detected by fluorescence.

#### 151 **Primary culture of *C. elegans* embryo cells**

152 *C. elegans* embryonic cells were generated as previously described (Strange, Christensen and  
153 Morrison, 2007). Worms were grown on 10 cm enriched peptone plate with NA22 *E. coli*. NA22  
154 bacteria grow in very thick layers that provide abundant food source for large quantities of worms.  
155 The synchronized gravid hermaphrodites were bleached to release eggs and washed with sterile egg  
156 buffer (118 mM NaCl, 48 mM KCl, 2 mM CaCl<sub>2</sub>, 2 mM MgCl<sub>2</sub>, 25 mM HEPES, pH 7.3, 340 mOsm,  
157 adjusted with sucrose). The isolated eggs were separated from debris by centrifugation in a 30%  
158 sucrose solution. Chitinase (1 U/ml, Sigma) digestion was performed to remove eggshells. The embryo  
159 cells were dissociated by pipetting and filtered through a sterile 5 $\mu$ m Durapore filter (Millipore). The  
160 cells were plated on glass coverslips coated with peanut lectin solution (SIGMA; 0.5 mg/ml) and  
161 cultured in L15 media (Gibco) supplemented with 50 U/ml penicillin, 50  $\mu$ g/ml streptomycin with  
162 10% fetal bovine serum (FBS, Invitrogen) for 72-96 hrs.

#### 163 **Expression of *pezo-1* in Sf9 insect cells**

164 We generated a baculovirus construct consisting of an 8 $\times$  histidines-maltose binding protein  
165 (MBP) tag over *pezo-1* isoform G synthesized nucleotide sequence (one of the longest isoforms

166 according to RNA sequencing, wormbase.org v. WS280). We infected Sf9 cells with the *pezo-1*  
167 containing baculovirus for 48 hours. Infected cells were plated on glass coverslips coated with a peanut  
168 lectin solution (SIGMA; 0.5 mg/ml) for patch-clamp experiments.

## 169 **Electrophysiology and mechanical stimulation**

170 Primary cultured embryo cells labeled with *Ppezo-1::GFP* from strains VVR3, VVR69, or  
171 VVR70 were recorded in the cell-attached configuration of the patch clamp technique. Control and  
172 infected Sf9 insect cells were recorded in the whole-cell patch clamp configuration. For on-cell  
173 recordings, the bath solution contained 140 mM KCl, 6 mM NaCl, 2 mM CaCl<sub>2</sub>, 1 mM MgCl<sub>2</sub>, 10 mM  
174 glucose, and 10 mM HEPES (pH 7.4; 340 mOsm, adjusted with sucrose). The pipette solution  
175 contained 140 mM NaCl, 6 mM KCl, 2 mM CaCl<sub>2</sub>, 1 mM MgCl<sub>2</sub>, 10 mM glucose, and 10 mM HEPES  
176 (pH 7.3; 330 mOsm, adjusted with sucrose). Pipettes were made out of borosilicate glass (Sutter  
177 Instruments) and were fire-polished before use until a resistance between 3 and 4 MΩ was reached.  
178 Currents were recorded at a constant voltage (-60 mV, unless otherwise noticed), sampled at 20 kHz,  
179 and low pass filtered at 2 kHz using a MultiClamp 700B amplifier and Clampex (Molecular Devices,  
180 LLC). Leak currents before mechanical stimulations were subtracted offline from the current traces.  
181 Cells were mechanically stimulated with negative pressure applied through the patch pipette using a  
182 High-Speed Pressure Clamp (ALA Scientific) automated using a MultiClamp 700B amplifier through  
183 Clampex (Molecular Devices, LLC). Cell-attached patches were probed using a square-pulse protocol  
184 consisting of -10 mmHg incremental pressure steps, each lasting 1 s in 10 s intervals. Cells which giga-  
185 seals did not withstand at least six consecutive steps of mechanical stimulation were excluded from  
186 analyses.  $I_{\text{steady}}$  was defined as the maximal current in the steady state. Deactivation was compared by  
187 determining the percentage of  $I_{\text{steady}}$  left 100 ms after the mechanical stimuli ended.

188 For whole-cell recordings, the bath solution contained 140 mM NaCl, 6 mM KCl, 2 mM CaCl<sub>2</sub>,  
189 1 mM MgCl<sub>2</sub>, 10 mM glucose, and 10 mM HEPES (pH 7.4). The pipette solution contained 140 mM  
190 CsCl, 5 mM EGTA, 1 mM CaCl<sub>2</sub>, 1 mM MgCl<sub>2</sub>, and 10 mM HEPES (pH 7.2). For indentation assays,



191 Sf9 cells were mechanically stimulated with a heat-polished blunt glass pipette (3–4  $\mu\text{m}$ ) driven by a  
192 piezo servo controller (E625, Physik Instrumente). The blunt pipette was mounted on a  
193 micromanipulator at an  $\sim 45^\circ$  angle and positioned 3–4  $\mu\text{m}$  above from the cells without indenting  
194 them. Displacement measurements were obtained with a square-pulse protocol consisting of 1  $\mu\text{m}$   
195 incremental indentation steps, each lasting 200 ms with a 2 ms ramp in 10 s intervals. Recordings  
196 with leak currents  $>200$  pA, with access resistance  $>10$  M $\Omega$ , and cells which giga-seals did not  
197 withstand at least five consecutive steps of mechanical stimulation were excluded from analyses.

198 Data and fits were plotted using OriginPro (from OriginLab). Sigmoidal fit was done with the  
199 following Boltzmann equation:

200 Eq. 1: 
$$f(x) = A_2 + \frac{A_1 - A_2}{1 + e^{(x - X_0)/dX}}$$

201 where  $A_2$  = final value,  $A_1$  = initial value;  $X_0$  = center, and  $dX$  = time constant.

## 202 **Data and Statistical analyses**

203 Data and statistical analyses were performed using DataGraph 4.6.1, MATLAB R2019a  
204 (MathWorks), and GraphPad InStat 3 software. Statistical methods and sample numbers are detailed  
205 in the corresponding figure legends. No technical replicates were included in the analyses.

206

207 **RESULTS**

208 ***pezo-1* is expressed in a wide variety of cells in the worm's pharynx**

209 To determine the expression of *pezo-1* in *C. elegans*, we used a fluorescent translational  
210 reporter made by the TransgeneOme Project (Hasse, Hyman and Sarov, 2016). This fosmid construct  
211 contains *pezo-1* native cis-regulatory elements, including introns, up to exon 17 and 3' UTR sequences  
212 linked in-frame to the green fluorescent protein (GFP; Figure 1A). The position of the GFP with  
213 respect to the remainder of the gene creates an unnatural truncated version of the PEZO-1 protein.  
214 Hence, it likely expresses a non-functional protein that misses 16 exons containing the majority of the  
215 *pezo-1* sequence (including the pore domain). GFP signals are present in all developmental stages and  
216 multiple cells (Supplementary Figure 1A-B), and it does not appear to be mosaic as similar expression  
217 patterns were observed in at least three independent transgenic lines. We imaged *pezo-1::GFP* worms  
218 at different focal planes to identify the different cells expressing GFP based on their morphological  
219 features (i.e., cell-bodies position, neurites extension and positions along the body, and branching).  
220 The strongest GFP signals that we identified come from the pharyngeal gland cells (Figure 1B, bright  
221 and fluorescence fields). These cells are composed of five cell bodies (two ventral g1s, one dorsal g1  
222 and two ventral g2s) located inside the pharynx terminal bulb and three anterior cytoplasmic  
223 projections: two shorts that are superposed ending in the metacarpus and a long one reaching the end  
224 of the pm3 muscle. These cells are proposed to be involved in digestion (Albertson and Thomson,  
225 1976; Ohmachi *et al.*, 1999), lubrication of the pharynx (Smit, Schnabel and Gaudet, 2008), generation  
226 and molting of the cuticle (Singh and Sulston, 1978; Höflich *et al.*, 2004), and resistance to pathogenic  
227 bacteria (Höflich *et al.*, 2004). Additionally, we visualized, *pezo-1::GFP* in a series of cells  
228 surrounding the muscle of the corpus and the isthmus (Figure 1C) whose morphology and location  
229 match with those of the arcade cells; these were previously hypothesized to be support cells (Albertson  
230 and Thomson, 1976). We also recognized as putative *pezo-1* expressing cells: glial cell AmSh,  
231 pharyngeal interneuron I3 (Figure 1D), and M3<sub>L/R</sub> somas and neurites (Figure 1E-F). These neurons

232 are involved in pharyngeal pumping relaxation (Avery, 1993). The finger-like structure known as the  
233 pharyngeal sieve, at the junction between corpus and isthmus, also expresses *pezo-1* (Figure 1F).

234 By crossing *pezo-1::GFP* with a *tph-1::DsRed* marker carrying strain, we were able to identify  
235 *pezo-1* expression in the pharyngeal NSM<sub>L/R</sub> secretory, motor, and sensory neurons (Figure 1G).  
236 Importantly, these serotonergic neurons have been proposed to sense food in the lumen of the  
237 pharynx through their proprioceptive-like endings and trigger feeding-related behaviors (i.e., increased  
238 pharyngeal pumping, decreased locomotion, and increased egg laying) (Albertson and Thomson,  
239 1976; Avery, Bargmann and Horvitz, 1993). In addition to the pharyngeal cells, we observed  
240 expression of *pezo-1* in the ventral nerve cord (VNC, Figure 1D) neurons, striated muscles  
241 (Supplementary Figure 1C), coelomocytes (Supplementary Figure 1D-E), spermatheca  
242 (Supplementary Figure 1B and 1E), vulval muscles (Supplementary Figure 1F), and various male  
243 neurons including the ray neurons (Supplementary Figure 1G). Importantly, the expression pattern  
244 reported by our *pezo-1* fosmid construct matches very well with the gene expression atlas for *C.*  
245 *elegans* neurons (Taylor *et al.*, 2020), except for the M3 neurons. The strong and varied *pezo-1*  
246 expression in the pharynx along with the function of the cells expressing it, led us to investigate the  
247 potential contribution of PEZO-1 to pharyngeal function.

248

249

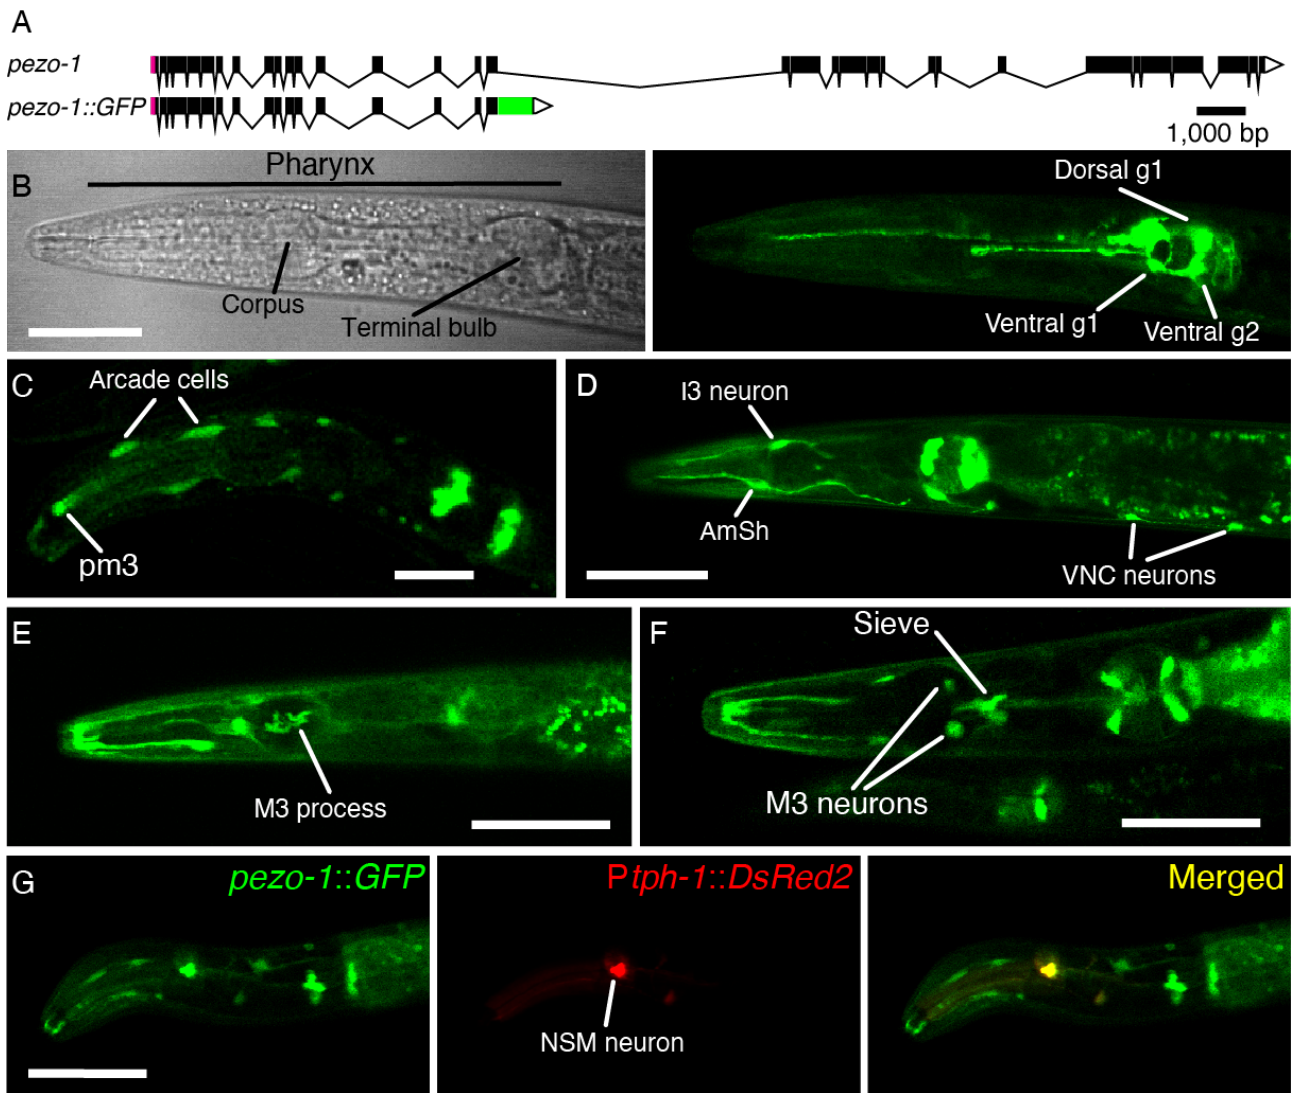

**Figure 1. *pezo-1* is strongly expressed in *C. elegans* pharynx.** (A) *pezo-1* gene diagram according to wormbase.org, v. WS280 made with Exon-Intron Graphic Maker <http://wormweb.org/>. Magenta rectangles and white triangles denote the 5' and 3' untranslated regions (UTR), respectively. Black rectangles denote exons and black lines denote introns. Green rectangle denotes the GFP sequence inserted after exon 17. (B) Brightfield (left) and fluorescence (right) micrographs of the anterior end of a young adult *pezo-1::GFP* hermaphrodite highlighting pharynx structures and the GFP reporter expression in gland cells. Scale bar represents 50  $\mu$ m. (C) Micrograph of the anterior end of a young adult *pezo-1::GFP* hermaphrodite expressing GFP in cells identified as arcade and pharyngeal muscle cells (pm3), according to their position. Scale bar represents 20  $\mu$ m. (D-E) Micrograph of the anterior end of a young adult *pezo-1::GFP* hermaphrodite expressing GFP in cells identified as neurons (I3, M3, VNCs) and sheath cell (AmSh), according to their position. Scale bar represents 50  $\mu$ m. (F) Micrograph of the anterior end of a young adult *pezo-1::GFP* hermaphrodite expressing GFP in cells identified as M3 and pharyngeal sieve, according to their position. Scale bar represents 100  $\mu$ m. (G) Co-localization between *tp-1::DsRed2* and *pezo-1::GFP* reporter in the neuron NSM. Scale bar represents 50  $\mu$ m. Micrographs are representative of at least 20 independent preparations.

## 251 Serotonin stimulation reveals different pharyngeal pump parameters

252 To analyze the contribution of *pezo-1* to pharyngeal pumping in *C. elegans*, we used the  
253 ScreenChip™ system (InVivo Biosystems) that allows measuring electropharyngeogram recordings  
254 (EPG; Figure 2A) (Raizen and Avery, 1994) by loading single-live worms inside a microfluidic chip.  
255 Figure 2A-B summarizes the pharynx anatomy, electrical properties measured during an EPG, and the  
256 neurons involved in pharyngeal function. For instance, the excitation event (E spike) precedes the  
257 pharyngeal contraction and is modulated by the pacemaker neuron MC (Figure 2B, top), whereas the  
258 repolarization event (R spike) leads to pharyngeal relaxation and correlates to the activity of the  
259 inhibitory M3 motoneurons (Figure 2B, middle). Every 3-4 pumps, there is relaxation of the terminal  
260 bulb (isthmus peristalsis) which is modulated by the motoneuron M4 (Figure 2B, bottom) (Avery and  
261 Horvitz, 1989). The main EPG events are regulated by the pharyngeal proprioceptive neuron NSM.  
262 Importantly, M3 motoneurons (potentially) and the NSM proprioceptive neuron express *pezo-1*  
263 (Figure 1E-G).

264 Analyses of the EPG records allow determination of different pharyngeal pumping parameters  
265 including frequency, duration, and the time interval that separates two pumping events (hereafter  
266 referred to as the interpump interval). We used serotonin to increase pharyngeal activity since, in the  
267 absence of food or serotonin, the pumping events are infrequent. Serotonin mimics food stimulation  
268 by activating the MC<sub>L/R</sub> and M3<sub>L/R</sub> neurons (Niacaris, 2003). First, we established a serotonin dose-  
269 response profile of the WT strain pharyngeal pumping parameters (N2; Figure 2C-G). Serotonin  
270 increases pharyngeal pumping frequency in a dose-dependent manner, with concentrations above 5  
271 mM increasing the likelihood of reaching 5 Hz (Figure 2C). We averaged the EPG recordings at each  
272 serotonin concentration and found a clear difference in pump durations between 0- and 5-mM.  
273 Concentrations equal or higher than 5 mM evoke similar pump durations (~100 ms; Figure 2D).  
274 Interestingly, analyses of the pump duration distribution profile under serotonin stimulation revealed  
275 that pharyngeal pump duration fits into two categories: fast (~80 ms) and slow (100-120 ms; Figure

276 2E; gray rectangles).

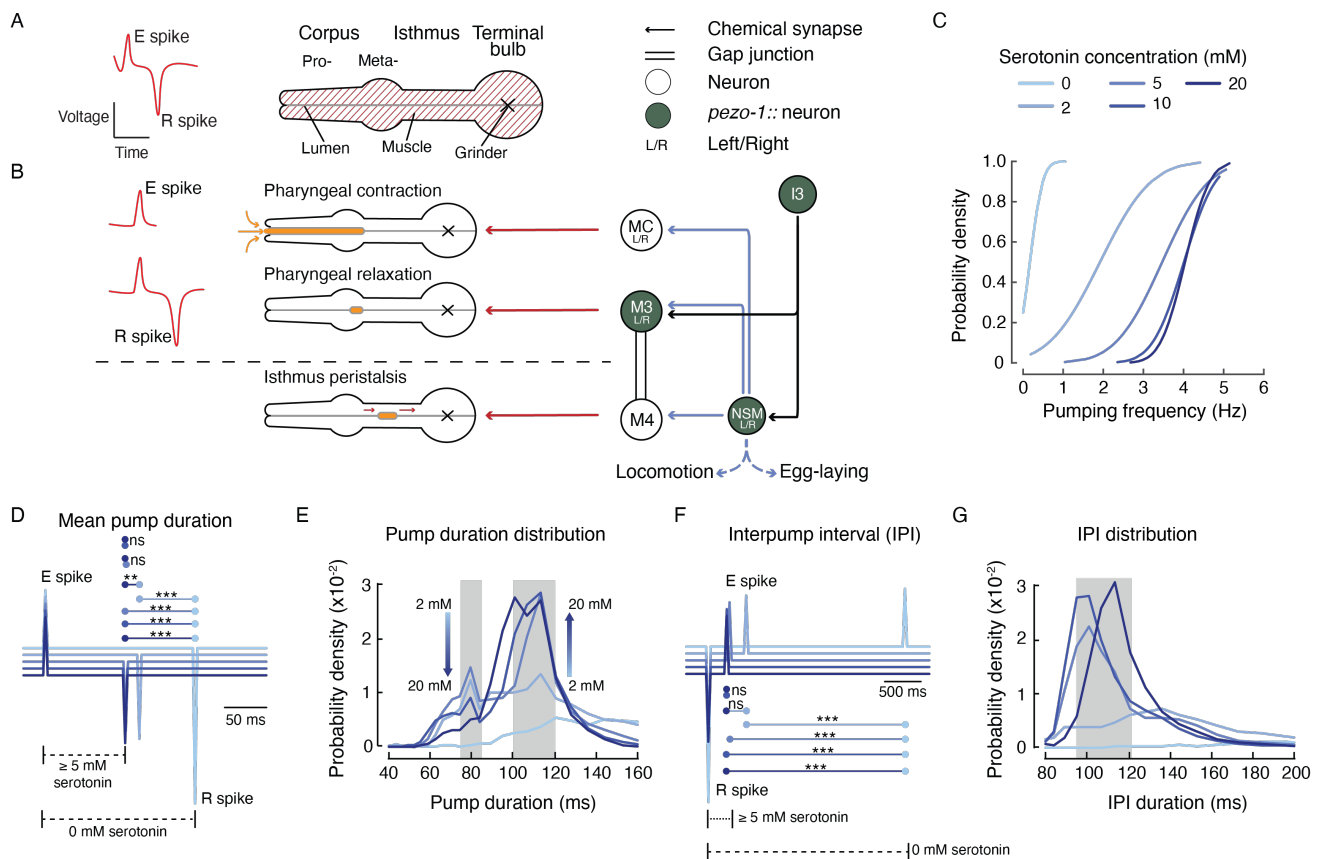

**Figure 2. Serotonin triggers pharyngeal pumping in a concentration-dependent manner in WT (N2) worms.** (A) Left, illustration of an electropharyngeogram (EPG) recording depicting the contraction-relaxation of the corpus, referred to as a pharyngeal pump. Right, illustration representing *C. elegans* pharyngeal muscle. (B) Representation of the main pharyngeal electrical coupling in *C. elegans*. Blue arrows represent serotonergic transmission, red arrows represent neuromuscular junction, double lines represent gap junction, filled circles represent neurons putatively expressing of *pezo-1*, open circles represent neurons not expressing *pezo-1*. (C) Probability densities for pharyngeal pumping frequencies at different serotonin concentrations. Results for every serotonin concentration were statistically compared by Kolmogorov-Smirnov test (*p*-values are shown in Table I). *n* is 90 worms per condition. (D) Ensemble averages of EPG traces for different serotonin concentrations showing pump durations (E to R spikes). One-way ANOVA and Tukey-Kramer multiple comparisons test. *n* is 90 worms per condition (E) Serotonin concentration effect on pump duration. A kernel probability distribution was fit to the data. *n* is 90 worms per condition. (F) Ensemble averages of EPG traces for different serotonin concentrations showing interpump interval (R to E spikes). One-way ANOVA and Tukey-Kramer multiple comparisons test. *n* is 90 worms per condition (G) Serotonin concentration effect interpump interval. A kernel probability distribution was fit to the data. *n* is 90 worms per condition. Asterisks indicate values significantly different (\*\**p* < 0.01) and ns indicates not significantly different.

277

278 We observed that the fast and slow categories displayed an inverse relationship with respect to  
 279 serotonin concentration (Figure 2E; arrows). We hypothesize that slow (100-120 ms) pumps are the  
 280 result of the serotonergic activation of M3<sub>L/R</sub> while the fast (~ 80 ms) pumps originate from a

281 mechanism that is partly independent from the serotonin pathway. Unlike pump duration, we observed  
282 only one category for interpump intervals around 95-120 ms for 5- to 20-mM serotonin concentrations  
283 (Figure 2F-G). Interestingly, we did not observe inter pump intervals faster than 90 ms, regardless of  
284 the serotonin concentration. The inter pump intervals results support the idea that there is a minimum  
285 refractory period between two pumps. This set of analyses allowed us to establish a suitable model for  
286 evaluating the role of *pezo-1* function *in vivo*.

### 287 ***pezo-1* mutants display higher pumping frequency than WT worms**

288 To determine whether *pezo-1* has a functional role in pharyngeal pumping, we engineered LOF  
289 and GOF mutants. A putative LOF mutant obtained by deleting 6,616 bp from the *pezo-1* locus  
290 (hereafter referred to as *pezo-1* KO; Figure 3A, top). Previous works demonstrated that the substitution  
291 of R2456H (located at the pore helix) of the ortholog human *Piezo1* gene increases cation permeability  
292 (GOF) and causes hemolytic anemia (Zarychanski *et al.*, 2012; Albuissou *et al.*, 2013; Bae *et al.*,  
293 2013). Moreover, a conservative substitution of Lys for Arg at position 2456 in the human *Piezo1*  
294 channel exhibits a pronounced decreased inactivation when compared to the WT or R2456H channels  
295 (Bae *et al.*, 2013). Hence, we engineered a putative GOF mutant strain obtained by substituting the  
296 conserved Arg 2373 with Lys (hereafter referred to as *pezo-1* R2373K or GOF; Figure 3A, bottom).  
297 Parenthetically, the R2373K numbering position is based on isoform G – one of the longest isoforms  
298 according to RNA sequencing (wormbase.org v. WS280). We also included in our analysis two  
299 mutants known to alter pharyngeal function, *eat-4(ad572)* and *avr-15(ad1051)*. EAT-4 is a glutamate-  
300 sodium symporter involved in postsynaptic glutamate reuptake. *eat-4(ad572)* affects the  
301 neurotransmission efficiency of all glutamatergic pharyngeal neurons (I<sub>2L/R</sub>, I<sub>5</sub>, M<sub>3L/R</sub>, M<sub>4</sub>, M<sub>I</sub>,  
302 NSM<sub>L/R</sub>) (Lee *et al.*, 1999). AVR-15 is a glutamate-gated chloride channel expressed in the pharyngeal  
303 muscle pm<sub>4</sub> and pm<sub>5</sub> (both synapsed by M<sub>3L/R</sub>) and involved in relaxation of the pharynx. Its mutant  
304 allele *ad1051* lengthen pump duration by delaying relaxation of the pharynx in a similar fashion as  
305 laser ablation of M<sub>3L/R</sub> neurons (Dent, Davis and Avery, 1997). With these strains, we sought to  
306 determine if altering PEZO-1 function would affect the worm's pharyngeal phenotype.

307 At 2 mM concentration of exogenous serotonin (to elicit pharyngeal activity), both *pezo-1* KO  
308 and R2373K mutants displayed significantly higher pumping frequencies than WT and similar to *avr-*  
309 *15(ad1051)* (Figure 3B). On the other hand, the *eat-4(ad572)* mutant displayed lower pumping  
310 frequency at this serotonin concentration. To further assess the *pezo-1* mutants' pharyngeal altered  
311 function, we analyzed the pump duration distributions from the EPG records. *pezo-1* KO distribution  
312 is similar to the WT (Figure 3C, red vs. black) whereas the R2373K mutant profile is reminiscent of  
313 the *avr-15(ad1051)*, as both mutant strains displayed a narrower distribution around 100 ms pump  
314 events (Figure 3C, blue and green vs. black). Moreover, the R2373K mutant lacked fast pump events  
315 between 50 to 80 ms (Figure 3C, blue bracket), similar to the WT features observed at high serotonin  
316 concentrations ( $\geq 5$  mM, Figure 2E), and the *eat-4(ad572)* mutant and the *avr-15(ad1051)* mutant at  
317 2 mM serotonin concentration (Figure 3C, yellow and green brackets). The analysis of distribution of  
318 interpump intervals revealed that *pezo-1* KO and R2373K mutants, although different, both spend less  
319 time resting between pumps (95-120 ms) than the WT ( $\approx 140$  ms) (Figure 3D, red and blue brackets).  
320 This enhancement in function resembles the WT activity measured at 5- to 20-mM serotonin  
321 concentrations (Figure 2F-G) and could account for the increase in frequency shown in Figure 3B. The  
322 close resemblance between the PEZO-1 GOF and the *avr-15(ad1051)* mutants' pharyngeal pumping  
323 parameters suggests a potential link between PEZO-1 and pharyngeal relaxation through M3<sub>L/R</sub>  
324 neurotransmission.

325

326



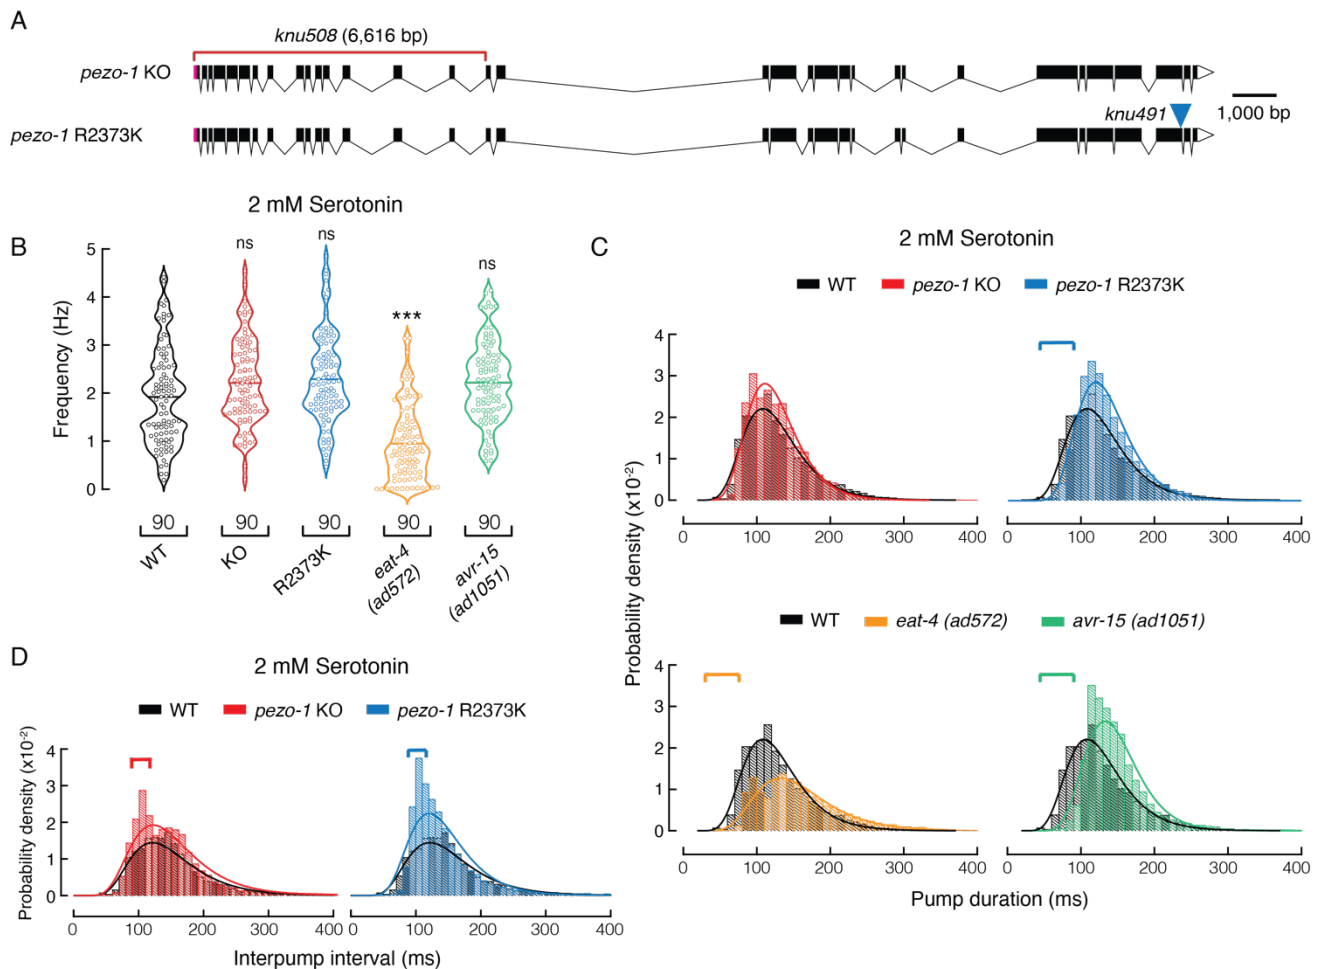

**Figure 3. PEZO-1 activation affects pharyngeal pumping properties at 2 mM serotonin.** (A) *pezo-1* gene diagram according to wormbase.org v. WS280 made with Exon-Intron Graphic Maker [WormWeb.org](http://WormWeb.org). Magenta rectangles and white triangles denote the 5' and 3' untranslated regions (UTR), respectively. Black rectangles denote exons and black lines denote introns. The red bracket denotes the *knu508* allele (a 6,616bp deletion) of the *pezo-1* KO strain and the blue triangle denotes the single point mutation (allele *knu491*) of the *pezo-1* R2373K strain. (B) Pharyngeal pumping frequencies depicted as violin plots with the means shown as horizontal bars for WT (N2), *pezo-1* KO, *pezo-1* R2373K, *eat-4* (*ad572*), and *avr-15* (*ad1051*) strains. n is denoted above the x-axis. Kruskal-Wallis and Dunn's multiple comparisons tests. Asterisks indicate values significantly different (\*\*\*)  $p < 0.001$  and ns indicates not significant. (C) Comparison between WT and *pezo-1* KO, *pezo-1* R2373K, *eat-4* (*ad572*), and *avr-15* (*ad1051*) strains pump duration distribution histograms. Smooth curves were fit to the data according to a log-normal distribution. Number of events  $\geq 20,860$ ; bin size 30. n is 90 worms per condition. (D) Comparison between WT, *pezo-1* KO, and *pezo-1* R2373K strains interpump interval distribution histograms, at 2 mM serotonin concentration. Smooth curves were fit to the data according to a log-normal distribution. Number of events  $\geq 10,200$ ; bin size 30. n is 90 worms per condition.

327

328

## 329 PEZO-1 determines pharyngeal pumping in response to hyperosmolarity

330 Mechanical stimuli come in many forms including stretching, bending, and osmotic forces  
331 (Cox, Bavi and Martinac, 2019). To further understand the functional role of *pezo-1*, we evaluated  
332 pharyngeal pumping parameters after challenging worm strains with different osmolarities. To this  
333 end, we diluted the standard solution used for worm experiments (M9 buffer) to different osmolarities  
334 (150, 260, and 320 mOsm). Low osmolarity solutions would be equivalent to swallowing food  
335 containing few solutes (150 mOsm) whereas high osmolarities would represent a “gulp” with large  
336 amounts of solutes (320 mOsm). Noteworthy, the higher the osmolarity, the shorter the mean pumping  
337 frequency of WT worms (Figure 4A). Our results indicate that the larger the number of solutes in  
338 solution, the longer they would reside in the pharynx before moving to the intestine. Notably, at 320  
339 mOsm, both *pezo-1* KO and GOF mutants displayed a significantly higher frequency than WT (Figure  
340 4A). On the other hand, at 260 and 150 mOsm we did not measure significant differences between WT  
341 and the *pezo-1* mutants. Similar to human Piezo2 KO and GOF mutations (associated with joint  
342 contractures), we demonstrated that lack of or enhanced PEZO-1 function modulated pharyngeal  
343 pumping frequencies in the same fashion (at high osmolarities). Next, we further examined the EPG  
344 parameters at high osmolarity (320 mOsm). Analyses of the distribution of pump durations and length  
345 of the mean interpump intervals revealed that both *pezo-1* mutants had more frequent fast pumps (80-  
346 120 ms, Figure 4B, gray rectangles) and spent less time resting between pumps than the WT (Figure  
347 4C). Interestingly, high osmolarity (320 mOsm) revealed a close resemblance between PEZO-1 GOF  
348 and the *avr-15(ad1051)* mutants’ pharyngeal pumping parameters (frequency and duration, Figure 4D-  
349 E) suggesting a potential link between PEZO-1 and M3<sub>L/R</sub> function. Altogether, our results suggest  
350 that PEZO-1 is required for fine tuning pharyngeal function in response to osmolarity changes.

351

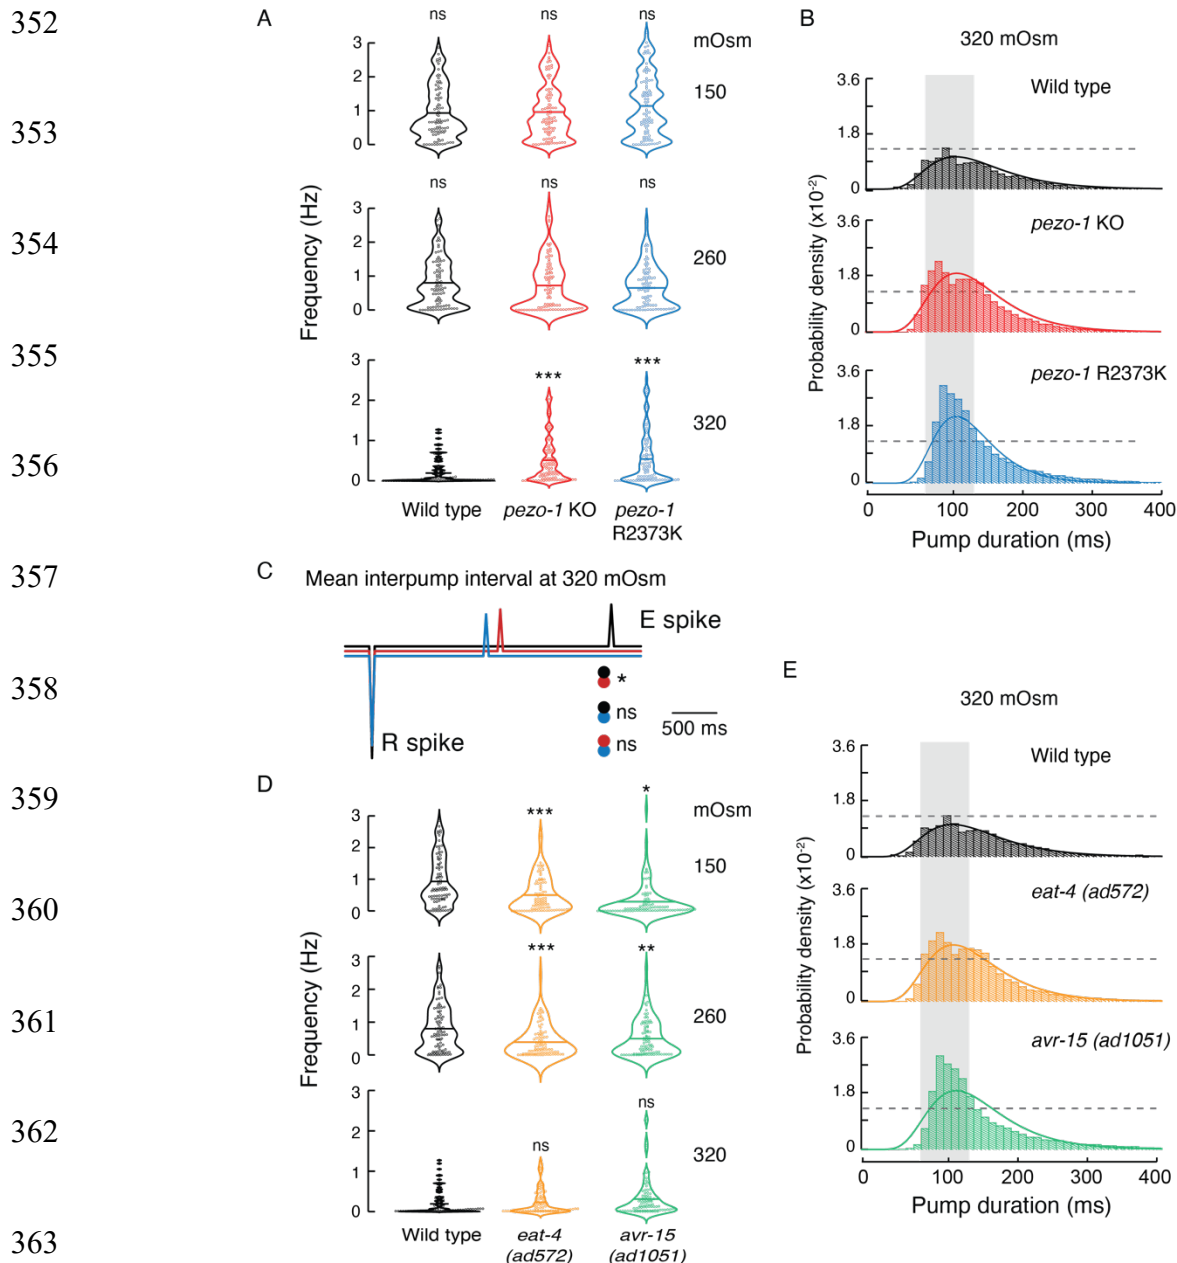

**Figure 4. Osmolarity changes modify pharyngeal pumping in WT and *pezo-1* strains.** (A) Pharyngeal pumping frequencies depicted as violin plots with the means shown as horizontal bars for WT (N2), *pezo-1* KO, and *pezo-1* R2373K strains at 150, 260, and 320 mOsm. n is 90 worms per condition. Kruskal-Wallis and Dunn's multiple comparisons tests. (B) Comparison of probability densities for pharyngeal pumping duration of WT, *pezo-1* KO, and *pezo-1* R2373K strains at 150, 260, and 320 mOsm. Smooth curves were fit to the data according to a log-normal distribution. Number of events  $\geq 21,110$ ; bin size 30. n is 90 worms per condition. (C) Ensemble averages of EPG traces for WT (N2), *pezo-1* KO, and *pezo-1* R2373K strains showing pump durations (E to R spikes) at 320 mOsm. One-way ANOVA and Tukey-Kramer multiple comparisons test. n is 90 worms per condition. (D) Pharyngeal pumping frequencies depicted as violin plots with the means shown as horizontal bars for WT (N2), *eat-4* (*ad572*), and *avr-15* (*ad1051*) strains at 150, 260, and 320 mOsm. n = 90, per condition. Kruskal-Wallis and Dunn's multiple comparisons tests. (E) Comparison of probability densities for pharyngeal pumping duration of WT, *eat-4* (*ad572*), and *avr-15* (*ad1051*) strains at 150, 260, and 320 mOsm. Smooth curves were fit to the data according to a log-normal distribution. Number of events  $\geq 21,110$ ; bin size 30. n is 90 worms per condition. Asterisks indicate values significantly different (\*\*\* $p < 0.001$ , \*\* $p < 0.01$ , and \* $p < 0.05$ ) and ns indicates not significant.

## 365 **PEZO-1 function is involved in food sensation**

366 To determine the impact that PEZO-1 function has on food intake, we recorded pharyngeal  
367 pumping of WT and *pezo-1* strains in response to different food stimuli. It has been hypothesized that  
368 food quality and feeding preferences displayed by worms is linked to the bacteria size (Shtonda and  
369 Avery, 2006). To this end, we measured worms pharyngeal pumping while feeding them the  
370 conventional food used in the laboratory for maintenance (*Escherichia coli* strain OP50). Additionally,  
371 we varied the dimensions of OP50 using the antibiotic cephalixin; an antibiotic that prevents the  
372 separation of budding bacteria, generating long spaghetti-like filaments of bacterium as observed  
373 under a microscope and elsewhere (Martinac *et al.*, 1987) (Supplementary Figure 2A). A similar  
374 method was previously described using the antibiotic aztreonam and has been shown to affect  
375 pharyngeal pumping (Gruninger, Gualberto and Garcia, 2008; ben Arous, Laffont and Chatenay,  
376 2009).

377 WT and *pezo-1* mutants are able to ingest spaghetti-like bacteria and reached adulthood in three  
378 days, similar to worms fed with control bacteria (Supplementary Figure 2B-C). Notably, feeding  
379 worms with control or spaghetti-like bacteria revealed different pharyngeal traits between the *pezo-1*  
380 mutants and the WT worms. When fed with control *E. coli*, both *pezo-1* mutants (KO and GOF) have  
381 higher mean frequencies, shorter mean pump durations, narrower pump duration distributions, and  
382 fastest mean interpump intervals than the WT worms (Figure 5A-C, E-F). On the other hand, feeding  
383 worms with spaghetti-like *E. coli* elicits opposite effects on the *pezo-1* mutants pharyngeal pumping  
384 parameters. For instance, spaghetti-like *E. coli* decreases *pezo-1* KO mean frequency, while keeping  
385 the mean pump duration and distribution similar to WT (Figure 5A-B, D). Furthermore, this modified  
386 diet significantly increases the mean interpump interval of the KO in comparison to the WT and the  
387 GOF mutant (Figure 5E-F). Unlike the KO and WT, the R2372K *pezo-1* mutant displays high  
388 frequency, short pumps (mean and distributions; Figure 5A-B, D) and short mean interpump interval  
389 durations (mean and distributions; Figure 5E-F). Altogether, our results indicate that PEZO-1 regulates  
390 the pharynx response to food physical parameters, such as length and shape of the ingested bacteria.

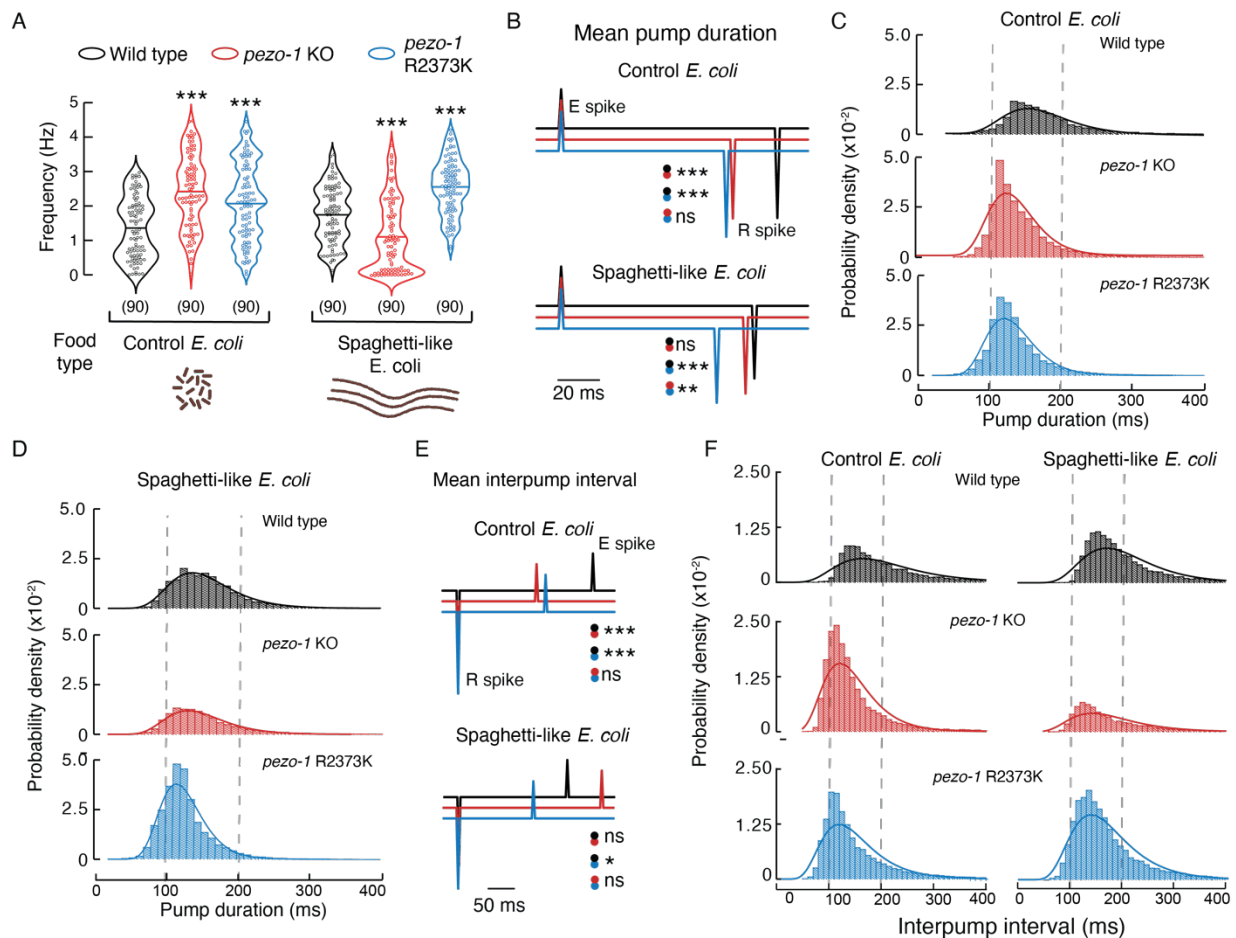

**Figure 5. PEZO-1 alters pharyngeal pumping when exposed to control or spaghetti-like bacteria.** (A) Pharyngeal pumping frequencies depicted as violin plots with the means shown as horizontal bars for WT (N2), *pezo-1* KO, and *pezo-1* R2373K when fed with control and cephalaxin-treated bacteria (spaghetti-like *E. coli*) (bacteria cartoons were created with BioRender.com). n is denoted above the x-axis. Kruskal-Wallis and Dunn's multiple comparisons tests. Asterisks indicate values significantly different (\*\*\*)  $p < 0.001$ . (B) Ensemble averages of EPG traces for WT (N2), *pezo-1* KO, and *pezo-1* R2373K strains showing pump durations (E to R spikes), when fed with control and cephalaxin-treated bacteria (spaghetti-like *E. coli*). One-way ANOVA and Tukey-Kramer multiple comparisons test. n is 90 worms per condition. (C) Comparison of probability densities for pharyngeal pump duration of wild-type (N2), *pezo-1* KO, and *pezo-1* R2373K when fed with control bacteria. Smooth curves were fit to the data according to a log-normal distribution. Number of events  $\geq 14,740$ ; bin size 30. n is 90 worms per condition. (D) Comparison of probability densities for pharyngeal pump durations of WT (N2), *pezo-1* KO, and *pezo-1* R2373K when fed with cephalaxin-treated bacteria (spaghetti-like *E. coli*). Smooth curves were fit to the data according to a log-normal distribution. Number of events  $\geq 19,160$ ; bin size 30. n is 90 worms per condition. (E) Ensemble averages of EPG traces for WT (N2), *pezo-1* KO, and *pezo-1* R2373K strains showing interpump interval (R to E spikes), when fed with control and cephalaxin-treated bacteria. One-way ANOVA and Tukey-Kramer multiple comparisons test. n is 90 worms per condition. (F) Comparison of probability densities for pharyngeal interpump interval of WT (N2), *pezo-1* KO, and *pezo-1* R2373K when fed with control and cephalaxin-treated bacteria. Smooth curves were fit to the data according to a log-normal distribution. Number of events  $\geq 9,950$ ; bin size 30. n is 90 worms per condition. Asterisks indicate values significantly different (\*\*\*)  $p < 0.001$ , \*\*  $p < 0.01$ , and \*  $p < 0.05$ ) and ns indicates not significantly different.

### 393 *pezo-1* encodes a mechanosensitive ion channel

394 The PEZO-1 protein sequence shares 60-70% similarity with mammalian PIEZO channel  
395 orthologs. However, whether PEZO-1 responds to mechanical stimuli has not yet been established. To  
396 address this major question, we generated three different *pezo-1* strains expressing the *pezo-1::GFP*,  
397 *pezo-1::GFP* KO, and *pezo-1::GFP* R2373K mutation. *pezo-1::GFP* cells were patch-clamped using  
398 the cell-attached configuration while applying constant negative pressure (-70 mmHg) and steps of  
399 positive and negative voltages to the pipette (Figure 6A-C). The current vs. voltage relationship is  
400 characterized by a reversal potential of +9.31 mV (Figure 6D), indicating that PEZO-1 mediates a  
401 slight cation selective conductance like the mouse and *Drosophila*'s orthologs (Coste *et al.*, 2012).

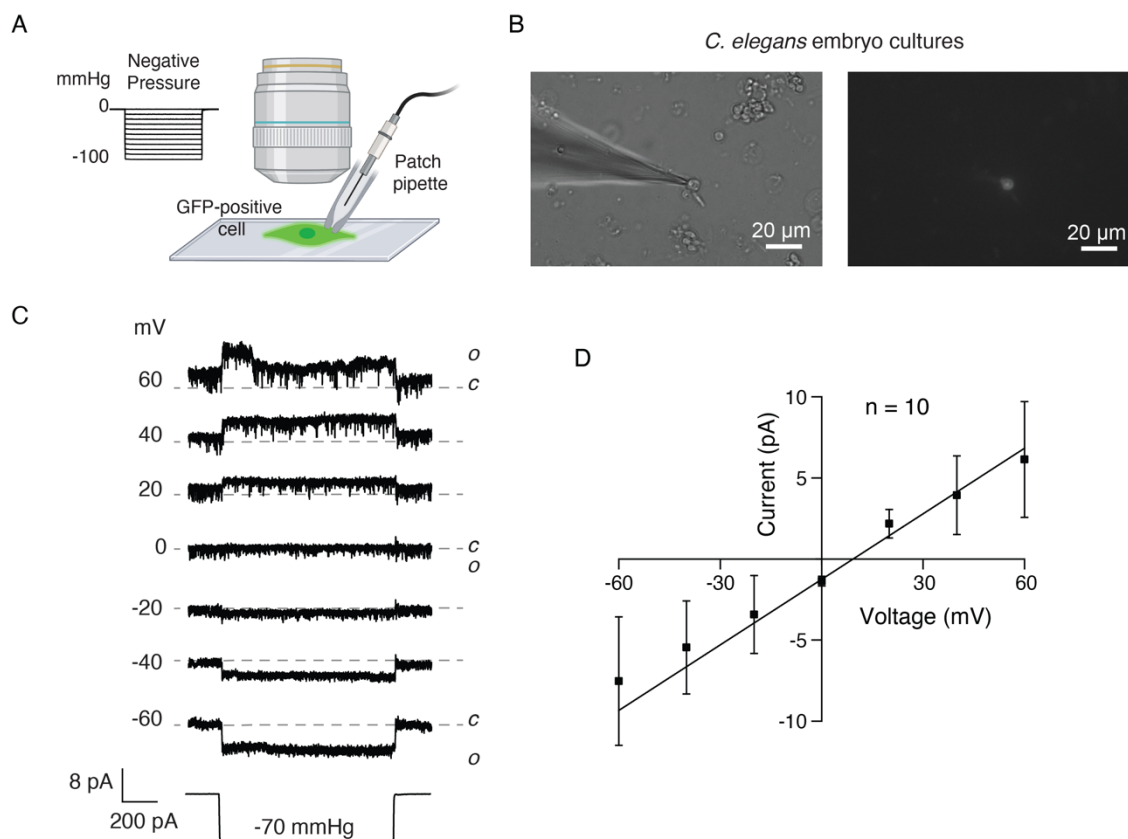

**Figure 6. Cells expressing PEZO-1 display mechanosensitive channel currents** (A) Schematic representation of the mechanical stimulation protocol applied to *pezo-1::GFP* expressing cells recorded in the cell-attached configuration. Created with BioRender.com. (B) Representative micrographs (from at least 10 independent preparations) of a *C. elegans* primary embryonic culture from *pezo-1::GFP* expressing strains. Brightfield (left) and fluorescence (right) micrographs of a *pezo-1::GFP* expressing cell when patch clamped in the on-cell configuration. (C) Representative cell-attached patch-clamp recordings of mechanically-activated currents from WT, *pezo-1* KO, and *pezo-1* R2373K cells expressing *pezo-1::GFP*. Channel openings (downward) were elicited by -70 mmHg square pulse (bottom) at constant voltages ranging from -60 to +60 mV. Gray dashed line represents background currents. Closed and open states are labeled *c* and *o*, respectively. (D) Current-voltage relation recorded at a constant pressure of -70 mmHg in the on-cell configuration. The reversal potential is 9.31 mV. Each circle represents the mean  $\pm$  SD.

403 Mechanical stimulation of cells expressing WT PEZO-1 elicited mechano-dependent currents  
404 (Figure 7A-C, black traces and bar) with a half pressure activation ( $P_{1/2}$ ) corresponding to  $-59.1 \pm 4.3$   
405 mmHg (mean  $\pm$  SEM). Importantly, *pezo-1::GFP* cells expressing KO PEZO-1 did not feature  
406 mechanosensitive currents, even at larger negative pressure magnitudes (Figure 7A and C, red traces  
407 and bar). On the other hand, PEZO-1 R2373K displayed mechano-dependent currents (Figure 7A-C,  
408 blue traces and bar) with lower  $P_{1/2}$  than the WT channel ( $39.2 \pm 2.2$  mmHg, mean  $\pm$  SEM), indicating  
409 that the GOF mutant requires less mechanical activation to open. Notably, the R2373K mutation  
410 introduced a latency for activation that was not detected in the WT (Figure 7A, blue traces and 7D).  
411 The decrease in mechanical threshold along with the slow activation were previously reported for the  
412 equivalent human PIEZO1 R2456K mutation in mammalian cell lines (Zarychanski *et al.*, 2012;  
413 Albuisson *et al.*, 2013; Bae *et al.*, 2013; Romero *et al.*, 2019). Future experiments are needed to  
414 understand the origin of these differences in activation. Unlike *pezo-1* WT, approximately 50% of the  
415 mechano currents elicited from the *pezo-1* R2373K expressing cells remained active even after the  
416 mechanical stimulus ended (Figure 7A, blue traces, and 7E). This slow deactivation is also reminiscent  
417 of the human PIEZO1 R2456K GOF phenotype previously characterized by Bae and collaborators  
418 (Bae *et al.*, 2013). Overall, our results support that PEZO-1 is an ion channel gated by membrane  
419 tension and that a conservative mutation in the pore domain elicits similar activation and kinetic  
420 changes as its human counterpart.

421 To further validate that the *pezo-1* gene encodes for a mechanosensitive ion channel, we  
422 heterologously expressed one of the longest isoforms of *pezo-1* (isoform G; wormbase.org v. WS280)  
423 in Sf9 cells. Similar to mammalian PIEZO channels, PEZO-1 mediates indentation-activated currents  
424 (Figure 8). Uninfected Sf9 cells do not display mechanosensitive channel currents (Figure 8B-C).  
425 Importantly PEZO-1 displayed the properties described for mammalian PIEZOs in other cell types  
426 including (Coste *et al.*, 2010; Wu *et al.*, 2017) non-selective cation currents, as determined by the  
427 reversal potential ( $+ 6.74$  mV; Figure 8D-E) and voltage-dependent inactivation (Figure 8D and 8F).  
428 Our results demonstrate that expressing *pezo-1* in a naïve cell was sufficient to confer  
429 mechanosensitivity to Sf9 cells.

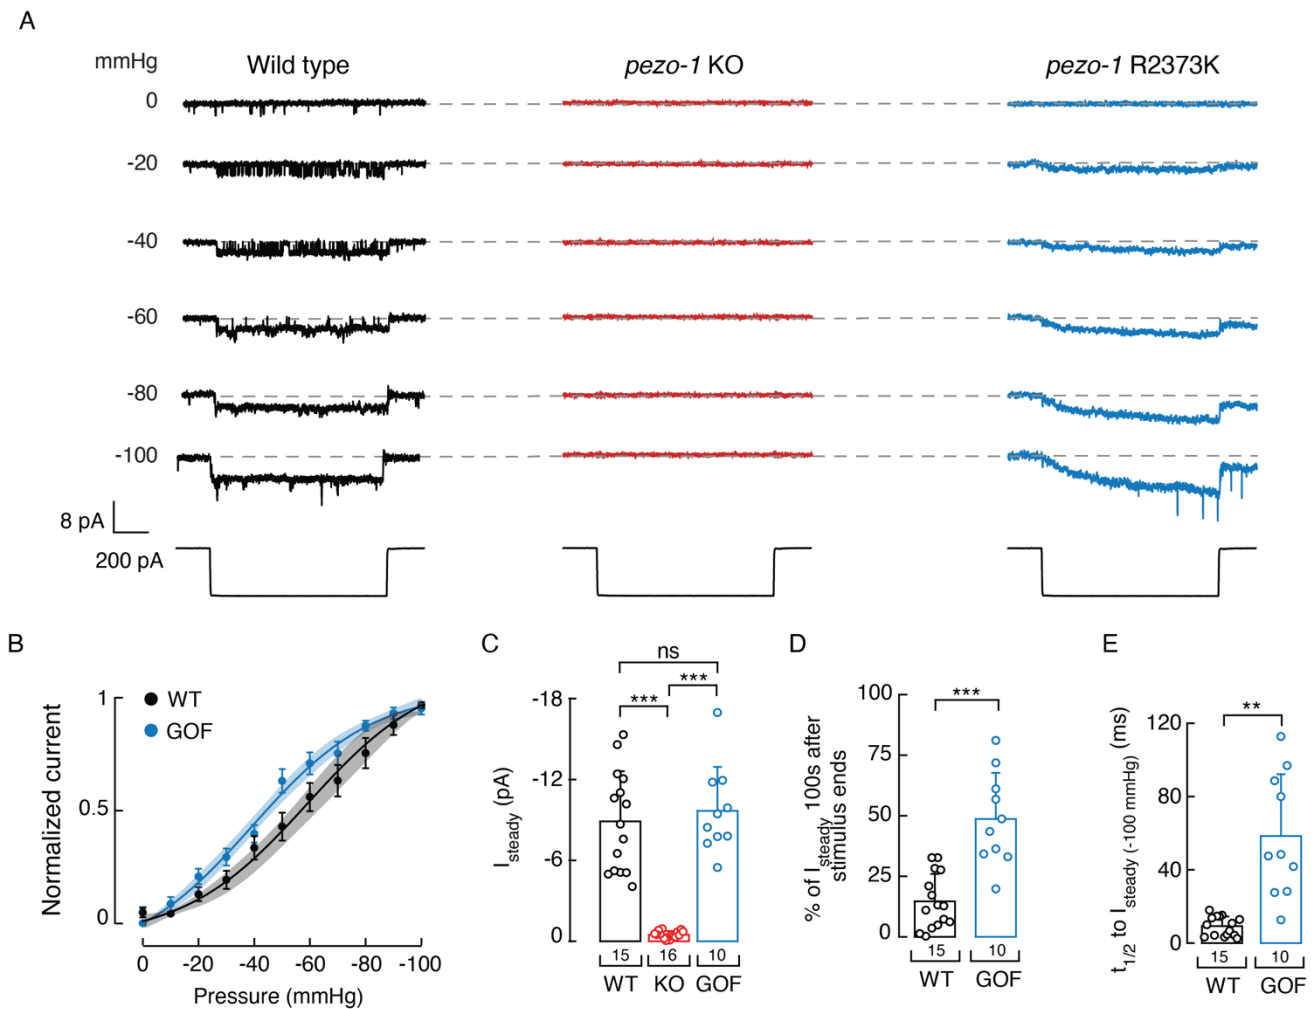

**Figure 7. PEZO-1 GOF mutant decreases mechanical threshold and slows down deactivation.**

(A) Representative cell-attached patch-clamp recordings of mechanically-activated currents from WT, *pezo-1* KO, and *pezo-1* R2373K cells expressing *pezo-1::GFP*. Channel openings (downward) were elicited by negative pressure (left) square pulses (bottom) at a constant voltage of -60 mV. Gray dashed line represents background currents and channel openings are downward. (B) Pressure-response profiles for PEZO-1 WT and R2373K currents. Normalized currents elicited by negative pressure of mechanically activated currents of WT and *pezo-1* R2373K cells expressing *pezo-1::GFP*. A Boltzmann function, Eq. (1), was fitted to the data. The shadows below the curves indicate the 95% confidence bands for the fit. Circles are mean  $\pm$  SD. n for WT and *pezo-1* R2373K are 15 and 10, respectively. (C) Bar graph displaying steady state currents elicited by -100 mmHg of negative pressure of WT, *pezo-1* KO, and *pezo-1* R2373K cells expressing *pezo-1::GFP*. Bars are mean  $\pm$  SD. n is denoted above the x-axis. Kruskal-Wallis and Dunn's multiple comparisons tests. (D) Bar graph displaying the time it takes to reach half of the steady state currents elicited with -100 mmHg of pressure of WT and *pezo-1* R2373K cells expressing *pezo-1::GFP*. Bars are all mean  $\pm$  SD. n is denoted above the x-axis. Unpaired t-test with Welch's correction. (E) Bar graph displaying percentage of steady state currents left 100 ms after the mechanical stimulus ended of WT and *pezo-1* R2373K cells expressing *pezo-1::GFP*. Bars are mean  $\pm$  SD. n is denoted above the x-axis. Unpaired t-test. Asterisks (\*\*\* $p$  < 0.001 and \*\* $p$  < 0.01) indicate values significantly different. ns indicates not significant.

430

431

432



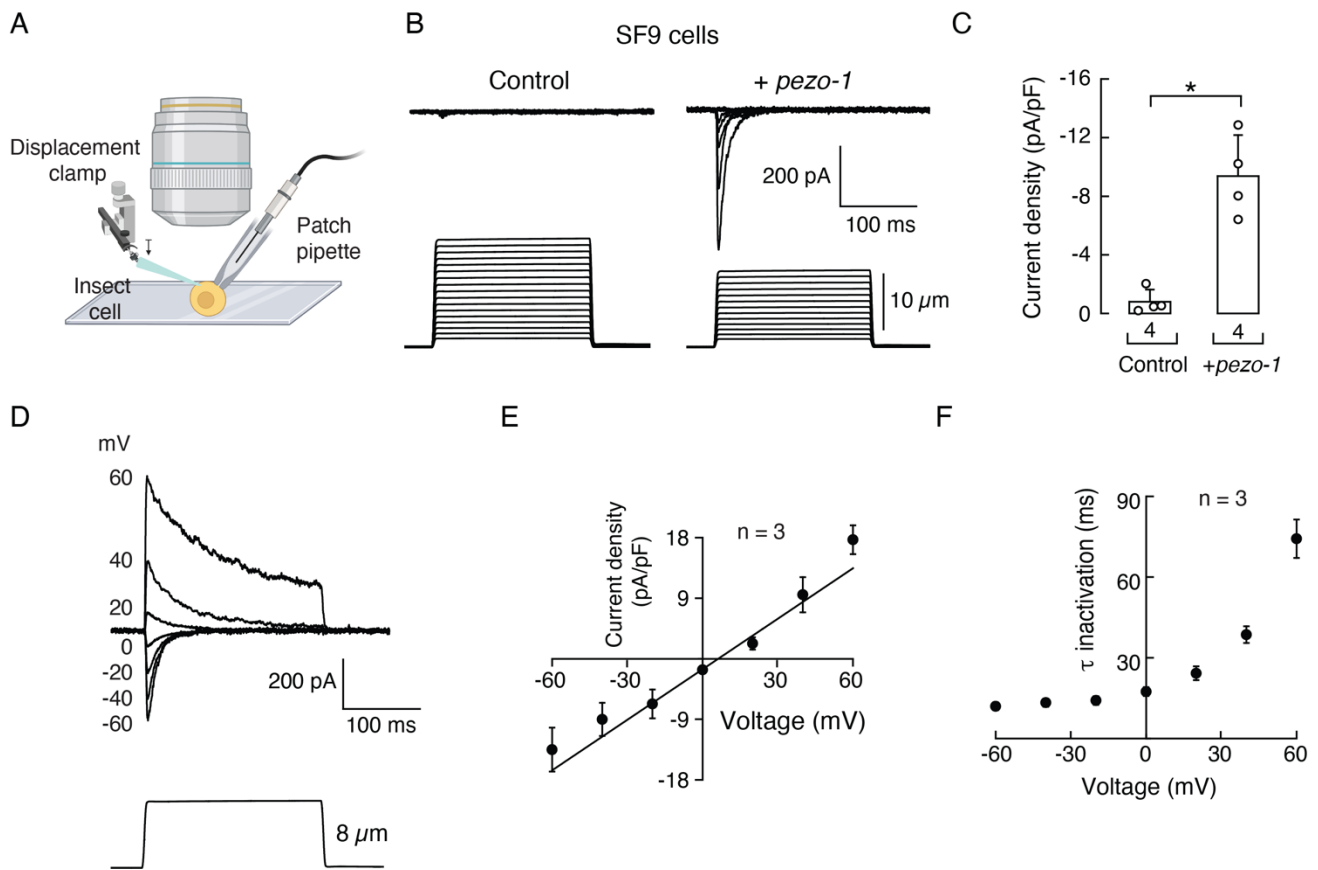

**Figure 8. Sf9 cells infected with a *pezo-1*-containing baculovirus display mechanosensitive currents.** (A) Schematic representation of the mechanical stimulation protocol applied to Sf9 cells infected with a baculovirus containing *pezo-1* recorded in the whole-cell configuration. Created with BioRender.com. (B) Representative whole-cell patch-clamp recordings (at  $-60$  mV) of Sf9 cells control or infected with a baculovirus containing *pezo-1* elicited by mechanical stimulation. (C) Current densities of Sf9 cells control or infected with a baculovirus containing *pezo-1* elicited by maximum displacement. n is denoted above the x-axis. Mann-Whitney test. Asterisk indicates values significantly different ( $*p < 0.05$ ). (D) Representative whole-cell patch-clamp recordings of Sf9 cells infected with a baculovirus containing *pezo-1* elicited by mechanical stimulation (bottom) at constant voltages ranging from  $-60$  to  $+60$  mV. (E) Current-voltage relation recorded at a constant displacement of  $8 \mu$ m in the whole-cell configuration. The reversal potential is  $6.74$  mV. Each circle represents the mean  $\pm$  SD. (F) PEZO-1 time constants of inactivation elicited by maximum displacement at constant voltages ranging from  $-60$  to  $+60$  mV. Each circle represents the mean  $\pm$  SD.

433

434

435

436

437

438 **DISCUSSION**

439 In 2010, Coste and collaborators reported that the *C. elegans* genome contained a single *Piezo*  
440 gene, *pezo-1* (Coste *et al.*, 2010). However, the functional role of *pezo-1* remained elusive even after  
441 a decade of its discovery. Here, we showed that PEZO-1 is a mechanosensitive channel with a novel  
442 functional role in the worm pharynx by combining fluorescent reporters, genome editing,  
443 electropharyngeogram, behavioral, and patch-clamp measurements. We found that *pezo-1* is highly  
444 expressed in neurons involved in pharyngeal pumping relaxation. In addition to its expression, several  
445 lines of evidence suggested that PEZO-1 modulated several discrete but reliable features of the  
446 pharyngeal function. Lack- or augmentation- of PEZO-1 function increased pharyngeal pumping  
447 frequencies when worms were challenged with 2 mM serotonin, hyperosmotic conditions, or fed with  
448 control bacteria. In the absence of functional PEZO-1, worms reduced pharyngeal function (i.e., low  
449 frequency and long pump intervals) when fed with spaghetti-like bacteria. Finally, we demonstrated  
450 that the *pezo-1* gene encodes a mechanosensitive ion channel. Altogether, our results established that  
451 PEZO-1 is important for pharyngeal function regulation and food sensation.

452 *C. elegans* feeding relies on the ability of its pharynx to contract and relax. The pharynx is a  
453 tube of electrically coupled muscle cells that continuously pump throughout the worm's life (Mango,  
454 2007). Several ion channels have been identified to be crucial for the pharyngeal muscle action  
455 potential, including acetylcholine receptors, T- and L-type  $\text{Ca}^{2+}$  channels, glycine receptors, and  $\text{K}^{+}$   
456 channels (Avery and You, 2012). Although the pharyngeal muscle is capable of pumping (albeit at  
457 low frequencies) without nervous system input, higher pumping frequencies are controlled by  
458 pharyngeal motor neurons, namely  $\text{MC}_{\text{L/R}}$  and  $\text{M3}_{\text{L/R}}$  (Avery and You, 2012). Nevertheless, the role of  
459 the nervous system in the control of rhythmic pharyngeal pumping is not completely understood. It is  
460 known, however, that the pharynx responds to a variety of neuromodulators (Avery and Horvitz,  
461 1989). We found that *pezo-1* is expressed in proprioceptive/mechanosensory neurons  $\text{NSM}_{\text{L/R}}$  and  
462  $\text{M3}_{\text{L/R}}$  (both important for the pharyngeal nervous system) and in the pharyngeal interneuron I3 (Avery  
463 and Horvitz, 1989). Unlike  $\text{NSM}_{\text{L/R}}$  and  $\text{M3}_{\text{L/R}}$ , the function of I3 has not been established (Avery,

464 1993; Avery and Thomas, 1997). Our results suggest that PEZO-1 is not essential for pharyngeal  
465 muscles, but fine tunes the role of the nervous system controlling the pharynx function. This is  
466 reminiscent of the novel role of mammalian PIEZO1 and PIEZO2 mediating neuronal sensing of blood  
467 pressure and the baroreceptor reflex (Zeng *et al.*, 2018).

468 NSM<sub>L/R</sub> and M3<sub>L/R</sub>, both *pezo-1*-expressing neurons, have been postulated to sense bacteria in  
469 the pharynx lumen via their proprioceptive endings and secrete serotonin in response to this  
470 mechanical stimulus (Avery, 1993; Avery and Thomas, 1997). Laser ablation of NSM<sub>L/R</sub> in *unc-29*  
471 mutants leads to subtle changes in pharyngeal pumping rate; however, this was done while  
472 simultaneously ablating other pharyngeal motor neurons (M1, M2<sub>L/R</sub>, M3<sub>L/R</sub>, M5, and MI) (Avery,  
473 1993). This approach could exert antagonistic effects on pumping rate yielding a steady pharyngeal  
474 activity. Using the Screenchip<sup>TM</sup> system allowed us to reveal the potential roles of extrapharyngeal  
475 neurons expressing *pezo-1* (NSM<sub>L/R</sub> and M3<sub>L/R</sub>). Our results determined that activation of PEZO-1  
476 inhibited serotonin-dependent fast pumping rate in the absence of food. They further demonstrated  
477 that PEZO-1 modulated the feeding behavior of worms confronted to various food consistencies  
478 (control and spaghetti-like bacteria). This led us to hypothesize that PEZO-1 is involved in food  
479 sensation and modulates pharyngeal pumping rate. Hence, similar to the mammalian ortholog PIEZO2,  
480 PEZO-1 is expressed in proprioceptive endings and involved in stretch reflexes (Woo *et al.*, 2015;  
481 Chesler *et al.*, 2016). Nevertheless, it remains to be determined if mammalian PIEZO channels play a  
482 role in food sensation and/or the swallowing reflex.

483 Humans sense various organoleptic food qualities such as visual aspects (color and shape),  
484 odorants through smell, and texture and flavor through tasting. In nematodes, there is a lack of  
485 understanding of what is sensed as food. Worms are able to filter particles from fluid in a size-  
486 dependent manner (Fang-Yen, Avery and Samuel, 2009; Kiyama, Miyahara and Ohshima, 2012) and  
487 feeding is facilitated by attractive odors or suppressed by repellents (e.g., diacetyl, isoamyl alcohol,  
488 quinine) (Gruninger, Gualberto and Garcia, 2008; Li *et al.*, 2012). Others have demonstrated that  
489 worms prefer to feed from active (i.e., bacteria reproducing rapidly and emitting high levels of CO<sub>2</sub>)

490 rather than inactive bacteria (Yu *et al.*, 2015). We determined that *pezo-1* KO worms “choke” when  
491 presented with spaghetti-like bacteria, whereas WT and GOF strains increase pharyngeal pumping  
492 when ingesting this elongated food. Therefore, we propose that the pharynx itself might be a sensory  
493 organ, as worms modify their pumping parameters when they sense solutions of different osmolarities  
494 or food with different textures and/or consistencies. We further hypothesized that worms are able to  
495 perceive changes in texture and adjust their pumping frequency by a mechanism requiring PEZO-1.  
496 Since *pezo-1* is not essential for *C. elegans* when cultured in standard laboratory conditions (e.g.,  
497 monoaxenically on *E. coli* OP50), we wonder if in its natural biotic environment this mechanosensitive  
498 ion channel plays a crucial role, as it does in humans and *Drosophila*. Given that worms grow in  
499 microbe-rich and heterogenous environments (feeding from prokaryotes of the genera *Acetobacter*,  
500 *Gluconobacter*, and *Enterobacter*) (Schulenburg and Félix, 2017), they might encounter bacteria of  
501 different dimensions and textures that will make *pezo-1* function more relevant to the worm’s ability  
502 to discriminate the food on which it grows best.

503         Why *pezo-1* loss- and gain-of-function mutations cause similar behavior phenotypes? Our data  
504 show that both *pezo-1* mutants (KO and GOF) increase the pumping frequency of the pharynx in  
505 different settings: serotonin exposure, high osmolarity, and ingestion of control bacteria. While it may  
506 seem counterintuitive at first, there are several scenarios in which too little or too much  
507 mechanosensation can be detrimental for animal’s behaviors. For instance, the *mec-4* gene encodes  
508 for the DEG/ENaC ion channel subunit of the mechanoelectrical transduction channel complex in  
509 touch. Like our *pezo-1* mutants that lack control of pharyngeal pumping function, LOF (*u253*, a  
510 deletion) and GOF (*e1611*, missense mutation A713V) alleles of the *mec-4* gene render touch-  
511 insensitive worms (Driscoll and Chalfie, 1991; Hong, Mano and Driscoll, 2000; O’Hagan, Chalfie and  
512 Goodman, 2005). Similarly, *deg-1*, a DEG/ENaC ion channel subunit expressed in ASH neurons, LOF  
513 (*u443*, eliminates the 3’ end of *deg-1*) and GOF (*u506*, missense mutation A393T) alleles decrease the  
514 worm’s ability to respond to nose touch (Savage *et al.*, 1989; García-Añoveros, Ma and Chalfie, 1995;  
515 Geffeney *et al.*, 2011). In humans, *PIEZO2* LOF (premature stop codon) and GOF (missense mutation

516 I802F) alleles caused joint contractures, skeletal abnormalities and alterations in muscle tone (Coste  
517 *et al.*, 2013; Chesler *et al.*, 2016; Yamaguchi *et al.*, 2019). Only when feeding worms, the spaghetti-  
518 like bacteria, we were able to uncover a difference between the LOF and the GOF mutants. Hence, we  
519 hypothesize that lacking the function of PEZO-1 significantly slows down pharyngeal function when  
520 passing down the lengthy bacteria from the pharynx to the gut.

521 Several requirements must be met for a channel to be considered mechanically gated  
522 (Arnadóttir and Chalfie, 2010). Accordingly, we found that *pezo-1* is expressed in the proprioceptive  
523 neuron NSM, knocking out *pezo-1* inhibits worm's pharyngeal function when challenged with  
524 hyperosmolarity or elongated bacteria, engineering a single point mutation in the putative pore domain  
525 (R2373K) elicited similar activation and deactivation delays that are reminiscent of the gating behavior  
526 reported for the human PIEZO1 R2456K (Bae *et al.*, 2013), and expression of *pezo-1* confers  
527 mechanosensitivity to, otherwise naïve, Sf9 cells. We propose that PEZO-1 is a mechanosensitive ion  
528 channel directly gated by bilayer tension given that the time it takes to reach half of the steady state  
529 currents ranges between 3.5 to 15 ms upon application of negative pressure. These are faster than  
530 activation times reported for the *Drosophila* phototransduction cascade, one of the quickest second  
531 messenger cascades (Hardie, 2001). These combined efforts highlight the versatile functions of the  
532 PIEZO mechanosensitive channel family as well as the strength of the model organism *C. elegans* to  
533 reveal physiological functions.

534 Our findings revealing PEZO-1 as a mechanosensitive ion channel that modulates pharyngeal  
535 function raise several important questions. How does *pezo-1* modulate pumping behavior electrical  
536 activity? Does *pezo-1* equally enhance or inhibit the function of the pharyngeal hypodermal, gland and  
537 muscle cells, and neurons expressing this channel? Could *pezo-1* phenotypes be exacerbated if the  
538 gene function is nulled in a cell-specific manner? Does PEZO-1 require auxiliary subunits and/or  
539 cytoskeleton for gating? Regardless of the answers, the plethora of physiological roles that this  
540 eukaryotic family of mechanosensitive ion channels play is outstanding. More experimental insight  
541 will be needed to grasp the full implications of *pezo-1* in the physiology of *C. elegans*.

## 542 **Acknowledgements**

543           The authors thank Dr. Julio F. Cordero-Morales, Dr. Andrés G. Vidal-Gadea, and Dr.  
544 Christopher E. Hopkins for critically reading the manuscript, and Dr. Rebeca Caires, MSc Briar Bell,  
545 and MBBS Soumi Mazumdar for technical assistance. *C. elegans* (N2, DA572, and DA1051) and *E.*  
546 *coli* strains (OP50 and NA22) were obtained from the *Caenorhabditis* Genetics Center, which is  
547 funded by the NIH Office of Research Infrastructure Programs (P40 OD010440). LX960 was provided  
548 by Dr. Kevin Collins (University of Miami). This work was supported by the American Heart  
549 Association (16SDG26700010 to VV) and the National Institutes of Health (R01GM133845 to VV)  
550 and the Neuroscience Institute at UTHSC (Research Associate Matching Salary Support to JL).

## 551 **Competing interests**

552           The authors declare no competing financial interests.

## 553 **Author contributions**

554           Conceptualization, VV; Methodology, VV and JRMM; Investigation, JRMM, LOR, and JL;  
555 Writing, VV and JRMM; Funding Acquisition, VV; Supervision, VV.

556

557 .

558

| <b>Comparison</b> | <b>p-value</b> |
|-------------------|----------------|
| '0mM' vs '2mM'    | 2.31E-31       |
| '0mM' vs '5mM'    | 8.82E-40       |
| '0mM' vs '10mM'   | 1.88E-40       |
| '0mM' vs '20mM'   | 1.88E-40       |
| '2mM' vs '5mM'    | 3.52E-16       |
| '2mM' vs '10mM'   | 7.35E-25       |
| '2mM' vs '20mM'   | 9.25E-28       |
| '5mM' vs '10mM'   | 0.000142       |
| '5mM' vs '20mM'   | 1.77E-06       |
| '10mM' vs '20mM'  | 0.10003        |

559

560 **Table I. Statistical comparison of serotonin concentration probability densities by Kolmogorov-**  
561 **Smirnov (Figure 2c).**

562

## **REFERENCES**

- 564 Albertson, D. G. and Thomson, J. N. (1976) “The pharynx of *Caenorhabditis elegans*,” *Philosophical*  
565 *Transactions of the Royal Society of London. B, Biological Sciences*, 275(938), pp. 299–325. doi:  
566 10.1098/rstb.1976.0085.
- 567 Albuissou, J. *et al.* (2013) “Dehydrated hereditary stomatocytosis linked to gain-of-function  
568 mutations in mechanically activated PIEZO1 ion channels,” *Nature Communications*, 4(May). doi:  
569 10.1038/ncomms2899.
- 570 Alper, S. L. (2017) “Genetic Diseases of PIEZO1 and PIEZO2 Dysfunction,” *Current Topics in*  
571 *Membranes*, 79. doi: 10.1016/bs.ctm.2017.01.001.
- 572 ben Arous, J., Laffont, S. and Chatenay, D. (2009) “Molecular and Sensory Basis of a Food Related  
573 Two-State Behavior in *C. elegans*,” *PLoS ONE*. Edited by V. Brezina, 4(10), p. e7584. doi:  
574 10.1371/journal.pone.0007584.
- 575 Arnadóttir, J. and Chalfie, M. (2010). “Eukaryotic mechanosensitive channels. *Annu Rev Biophys.*,  
576 pp. 39:111-37. doi: 10.1146/annurev.biophys.37.032807.125836. PMID: 20192782.
- 577 Avery, L. (1993) “Motor neuron M3 controls pharyngeal muscle relaxation timing in *Caenorhabditis*  
578 *elegans*,” *The Journal of experimental biology*, 175, pp. 283–297.
- 579 Avery, L., Bargmann, C. I. and Horvitz, H. R. (1993) “The *Caenorhabditis elegans* unc-31 gene  
580 affects multiple nervous system-controlled functions,” *Genetics*, 134(2), pp. 455–64. Available at:  
581 <http://www.ncbi.nlm.nih.gov/pubmed/8325482>.
- 582 Avery, L. and Horvitz, H. R. (1989) “Pharyngeal pumping continues after laser killing of the  
583 pharyngeal nervous system of *C. elegans*,” *Neuron*, 3(4), pp. 473–485. doi: 10.1016/0896-  
584 6273(89)90206-7.
- 585 Avery, L. and Thomas, J. H. (1997) “Feeding and Defecation,” in. Cold Spring Harbor Laboratory  
586 Press, Cold Spring Harbor (NY). Available at: <https://www.ncbi.nlm.nih.gov/books/NBK20138>.
- 587 Avery, L. and You, Y.-J. (2012) “*C. elegans* feeding,” *WormBook: the online review of C. elegans*  
588 *biology*, pp. 1–23. doi: 10.1895/wormbook.1.150.1.
- 589 Bae, C. *et al.* (2013) “Xerocytosis is caused by mutations that alter the kinetics of the  
590 mechanosensitive channel PIEZO1,” *Proceedings of the National Academy of Sciences of the United*  
591 *States of America*, 110(12). doi: 10.1073/pnas.1219777110.
- 592 Bai, X. *et al.* (2020) “*Caenorhabditis elegans* piezo channel coordinates multiple reproductive tissues  
593 to govern ovulation,” *eLife*, 9, pp. 1–35. doi: 10.7554/eLife.53603.
- 594 Chesler, A. T. *et al.* (2016) “The Role of PIEZO2 in Human Mechanosensation,” *The New England*  
595 *journal of medicine*, 375(14), pp. 1355–1364. doi: 10.1056/NEJMoa1602812.
- 596 Coste, B. *et al.* (2010) “Piezo1 and Piezo2 Are Essential Components of Distinct Mechanically  
597 Activated Cation Channels,” *Science*, 330(6000), pp. 55–60. doi: 10.1126/science.1193270.
- 598 Coste, B. *et al.* (2012). “Piezo proteins are pore-forming subunits of mechanically activated  
599 channels”. *Nature*, 483(7388), pp. 176-81. doi: 10.1038/nature10812.
- 600 Coste, B. *et al.* (2013) “Gain-of-function mutations in the mechanically activated ion channel  
601 PIEZO2 cause a subtype of Distal Arthrogyrosis,” *Proceedings of the National Academy of*  
602 *Sciences of the United States of America*, 110(12). doi: 10.1073/pnas.1221400110.
- 603 Cox, C. D., Bavi, N. and Martinac, B. (2019) “Biophysical Principles of Ion-Channel-Mediated  
604 Mechanosensory Transduction,” *Cell Reports*. doi: 10.1016/j.celrep.2019.08.075.
- 605 Dent, J. A., Davis, M. W. and Avery, L. (1997) “avr-15 encodes a chloride channel subunit that  
606 mediates inhibitory glutamatergic neurotransmission and ivermectin sensitivity in *Caenorhabditis*  
607 *elegans*,” *The EMBO Journal*, 16(19), pp. 5867–5879. doi: 10.1093/emboj/16.19.5867.
- 608 Douguet, D. and Honoré, E. (2019) “Mammalian Mechano-electrical Transduction: Structure and  
609 Function of Force-Gated Ion Channels,” *Cell*, 179(2), pp. 340–354. doi: 10.1016/j.cell.2019.08.049.
- 610 Driscoll, M. and Chalfie, M. (1991) “The *mec-4* gene is a member of a family of *Caenorhabditis*  
611 *elegans* genes that can mutate to induce neuronal degeneration,” *Nature*, 349(6310), pp. 588–593.  
612 doi: 10.1038/349588a0.



- 613 Fang-Yen, C., Avery, L. and Samuel, A. D. T. (2009) “Two size-selective mechanisms specifically  
614 trap bacteria-sized food particles in *Caenorhabditis elegans*,” *Proceedings of the National Academy  
615 of Sciences*, 106(47), pp. 20093–20096. doi: 10.1073/pnas.0904036106.
- 616 García-Añoveros, J., Ma, C. and Chalfie, M. (1995) “Regulation of *Caenorhabditis elegans*  
617 degenerin proteins by a putative extracellular domain,” *Current Biology*, 5(4), pp. 441–448. doi:  
618 10.1016/S0960-9822(95)00085-6.
- 619 Geffeney, S. L. *et al.* (2011) “DEG/ENaC but not TRP channels are the major mechanoelectrical  
620 transduction channels in a c. *Elegans* nociceptor,” *Neuron*, 71(5), pp. 845–857. doi:  
621 10.1016/j.neuron.2011.06.038.
- 622 Geffeney, S. L. and Goodman, M. B. (2012) “How we feel: ion channel partnerships that detect  
623 mechanical inputs and give rise to touch and pain perception.,” *Neuron*, 74(4), pp. 609–19. doi:  
624 10.1016/j.neuron.2012.04.023.
- 625 Gruninger, T. R., Gualberto, D. G. and Garcia, L. R. (2008) “Sensory perception of food and insulin-  
626 like signals influence seizure susceptibility,” *PLoS genetics*, 4(7), p. e1000117. doi:  
627 10.1371/journal.pgen.1000117.
- 628 Hamilton, E. S., Schlegel, A. M. and Haswell, E. S. (2015) “United in diversity: mechanosensitive  
629 ion channels in plants,” *Annual review of plant biology*, 66, pp. 113–37. doi: 10.1146/annurev-  
630 arplant-043014-114700.
- 631 Hardie, R. C. (2001) “Phototransduction in *Drosophila melanogaster*,” *Journal of Experimental  
632 Biology*.
- 633 Hasse, S., Hyman, A. A. and Sarov, M. (2016) “TransgeneOmics – A transgenic platform for protein  
634 localization based function exploration,” *Methods*, 96, pp. 69–74. doi: 10.1016/j.ymeth.2015.10.005.
- 635 Höflich, J. *et al.* (2004) “Loss of srf-3 -encoded Nucleotide Sugar Transporter Activity in *C*  
636 *aenorhabditis elegans* Alters Surface Antigenicity and Prevents Bacterial Adherence,” *Journal of  
637 Biological Chemistry*, 279(29), pp. 30440–30448. doi: 10.1074/jbc.M402429200.
- 638 Hong, K., Mano, I. and Driscoll, M. (2000) “In vivo structure-function analyses of *Caenorhabditis*  
639 *elegans* MEC-4, a candidate mechanosensory ion channel subunit,” *Journal of Neuroscience*, 20(7),  
640 pp. 2575–2588. doi: 10.1523/jneurosci.20-07-02575.2000.
- 641 Ikeda, R. *et al.* (2014) “Merkel cells transduce and encode tactile stimuli to drive A $\beta$ -afferent  
642 impulses,” *Cell*, 157(3), pp. 664–75. doi: 10.1016/j.cell.2014.02.026.
- 643 Keane, J. and Avery, L. (2003) “Mechanosensory inputs influence *Caenorhabditis elegans*  
644 pharyngeal activity via ivermectin sensitivity genes,” *Genetics*, 164(1), pp. 153–62. Available at:  
645 <http://www.ncbi.nlm.nih.gov/pubmed/12750328>.
- 646 Kim, S. E. *et al.* (2012) “The role of *Drosophila* Piezo in mechanical nociception,” *Nature*,  
647 483(7388). doi: 10.1038/nature10801.
- 648 Kiyama, Y., Miyahara, K. and Ohshima, Y. (2012) “Active uptake of artificial particles in the  
649 nematode *Caenorhabditis elegans*,” *Journal of Experimental Biology*, 215(7), pp. 1178–1183. doi:  
650 10.1242/jeb.067199.
- 651 Kung, C., Martinac, B. and Sukharev, S. (2010) “Mechanosensitive channels in microbes,” *Annual  
652 review of microbiology*, 64, pp. 313–29. doi: 10.1146/annurev.micro.112408.134106.
- 653 Lee, K. S. *et al.* (2017) “Serotonin-dependent kinetics of feeding bursts underlie a graded response to  
654 food availability in *C. elegans*,” *Nature Communications*, 8(1), p. 14221. doi:  
655 10.1038/ncomms14221.
- 656 Lee, R. Y. N. *et al.* (1999) “EAT-4, a Homolog of a Mammalian Sodium-Dependent Inorganic  
657 Phosphate Cotransporter, Is Necessary for Glutamatergic Neurotransmission in *Caenorhabditis*  
658 *elegans*,” *The Journal of Neuroscience*, 19(1), pp. 159–167. doi: 10.1523/JNEUROSCI.19-01-  
659 00159.1999.
- 660 Li, J. *et al.* (2014) “Piezo1 integration of vascular architecture with physiological force,” *Nature*,  
661 515(7526). doi: 10.1038/nature13701.
- 662 Li, Z. *et al.* (2012) “Dissecting a central flip-flop circuit that integrates contradictory sensory cues in  
663 *C. elegans* feeding regulation,” *Nature Communications*, 3(1), p. 776. doi: 10.1038/ncomms1780.
- 664 Ma, S. *et al.* (2018) “Common PIEZO1 Allele in African Populations Causes RBC Dehydration and  
665 Attenuates Plasmodium Infection,” *Cell*, 173(2). doi: 10.1016/j.cell.2018.02.047.

- 666 Maksimovic, S. *et al.* (2014) “Epidermal Merkel cells are mechanosensory cells that tune  
667 mammalian touch receptors.,” *Nature*, 509(7502), pp. 617–21. doi: 10.1038/nature13250.
- 668 Mango, S. E. (2007) “The *C. elegans* pharynx: a model for organogenesis.,” *WormBook: the online*  
669 *review of C. elegans biology*, pp. 1–26. doi: 10.1895/wormbook.1.129.1.
- 670 Martinac, B. *et al.* (1987) “Pressure-sensitive ion channel in *Escherichia coli*,” *Proceedings of the*  
671 *National Academy of Sciences of the United States of America*, 84(8), pp. 2297–2301. doi:  
672 10.1073/pnas.84.8.2297.
- 673 Min, S. *et al.* (2020) “Control of feeding by Piezo-mediated gut mechanosensation in *Drosophila* 1  
674 2,” *bioRxiv*, p. 2020.09.11.293712. Available at: <https://doi.org/10.1101/2020.09.11.293712>.
- 675 Murthy, S. E. *et al.* (2018) “The mechanosensitive ion channel Piezo2 mediates sensitivity to  
676 mechanical pain in mice,” *Science Translational Medicine*, 10(462), p. eaat9897. doi:  
677 10.1126/scitranslmed.aat9897.
- 678 Niacaris, T. (2003) “Serotonin regulates repolarization of the *C. elegans* pharyngeal muscle,”  
679 *Journal of Experimental Biology*, 206(2), pp. 223–231. doi: 10.1242/jeb.00101.
- 680 O’Hagan, R., Chalfie, M. and Goodman, M. B. (2005) “The MEC-4 DEG/ENaC channel of  
681 *Caenorhabditis elegans* touch receptor neurons transduces mechanical signals.,” *Nature*  
682 *neuroscience*, 8(1), pp. 43–50. doi: 10.1038/nn1362.
- 683 Ohmachi, M. *et al.* (1999) “kel-1, a novel Kelch-related gene in *Caenorhabditis elegans*, is expressed  
684 in pharyngeal gland cells and is required for the feeding process,” *Genes to Cells*, 4(6), pp. 325–337.  
685 doi: 10.1046/j.1365-2443.1999.00264.x.
- 686 Pan, B. *et al.* (2018) “TMC1 Forms the Pore of Mechanosensory Transduction Channels in  
687 Vertebrate Inner Ear Hair Cells.,” *Neuron*, 99(4), pp. 736–753.e6. doi:  
688 10.1016/j.neuron.2018.07.033.
- 689 Parpaite, T. and Coste, B. (2017) “Piezo channels,” *Current Biology*, 27(7), pp. R250–R252. doi:  
690 10.1016/j.cub.2017.01.048.
- 691 Pathak, M. M. *et al.* (2014) “Stretch-activated ion channel Piezo1 directs lineage choice in human  
692 neural stem cells.,” *Proceedings of the National Academy of Sciences of the United States of*  
693 *America*, 111(45), pp. 16148–53. doi: 10.1073/pnas.1409802111.
- 694 Raizen, D. M. and Avery, L. (1994) “Electrical activity and behavior in the pharynx of  
695 *caenorhabditis elegans*,” *Neuron*, 12(3), pp. 483–495. doi: 10.1016/0896-6273(94)90207-0.
- 696 Raizen, D. M., Lee, R. Y. N. and Avery, L. (1995) “Interacting genes required for pharyngeal  
697 excitation by motor neuron MC in *Caenorhabditis elegans*,” *Genetics*, 141(4), pp. 1365–1382.
- 698 Ranade, S. S. *et al.* (2014) “Piezo2 is the major transducer of mechanical forces for touch sensation  
699 in mice.,” *Nature*, 516(7529), pp. 121–5. doi: 10.1038/nature13980.
- 700 Retailleau, K. *et al.* (2015) “Piezo1 in Smooth Muscle Cells Is Involved in Hypertension-Dependent  
701 Arterial Remodeling.,” *Cell reports*, 13(6), pp. 1161–1171. doi: 10.1016/j.celrep.2015.09.072.
- 702 Rode, B. *et al.* (2017) “Piezo1 channels sense whole body physical activity to reset cardiovascular  
703 homeostasis and enhance performance.,” *Nature communications*, 8(1), p. 350. doi: 10.1038/s41467-  
704 017-00429-3.
- 705 Romero, L. O. *et al.* (2019) “Dietary fatty acids fine-tune Piezo1 mechanical response,” *Nature*  
706 *Communications*, 10(1), pp. 1–14. doi: 10.1038/s41467-019-09055-7.
- 707 Savage, C. *et al.* (1989) “mec-7 is a beta-tubulin gene required for the production of 15-  
708 protofilament microtubules in *Caenorhabditis elegans*.,” *Genes & development*, 3(6), pp. 870–881.  
709 doi: 10.1101/gad.3.6.870.
- 710 Schindelin, J. *et al.* (2009) “Fiji - an Open platform for biological image analysis,” *Nature Methods*,  
711 9(7). doi: 10.1038/nmeth.2019.Fiji.
- 712 Schulenburg, H. and Félix, M. A. (2017) “The natural biotic environment of *Caenorhabditis*  
713 *elegans*,” *Genetics*, 206(1), pp. 55–86. doi: 10.1534/genetics.116.195511.
- 714 Shtonda, B. B. and Avery, L. (2006) “Dietary choice behavior in *Caenorhabditis elegans*,” *Journal of*  
715 *Experimental Biology*, 209(1), pp. 89–102. doi: 10.1242/jeb.01955.
- 716 Singh, R. N. and Sulston, J. E. (1978) “Some Observations On Moulting in *Caenorhabditis Elegans*,”  
717 *Nematologica*, 24(1), pp. 63–71. doi: 10.1163/187529278X00074.

- 718 Smit, R. B., Schnabel, R. and Gaudet, J. (2008) “The HLH-6 Transcription Factor Regulates C.  
719 elegans Pharyngeal Gland Development and Function,” *PLoS Genetics*. Edited by S. E. Mango,  
720 4(10), p. e1000222. doi: 10.1371/journal.pgen.1000222.
- 721 Strange, K., Christensen, M. and Morrison, R. (2007) “Primary culture of *Caenorhabditis elegans*  
722 developing embryo cells for electrophysiological, cell biological and molecular studies,” *Nature*  
723 *Protocols*, 2(4), pp. 1003–1012. doi: 10.1038/nprot.2007.143.
- 724 Szczot, M. *et al.* (2018) “PIEZO2 mediates injury-induced tactile pain in mice and humans,” *Science*  
725 *Translational Medicine*, 10(462), p. eaat9892. doi: 10.1126/scitranslmed.aat9892.
- 726 Taylor, S. R. *et al.* (2020) “Molecular topography of an entire nervous system,” *bioRxiv*. doi:  
727 10.1101/2020.12.15.422897.
- 728 Trojanowski, N. F., Raizen, D. M. and Fang-Yen, C. (2016) “Pharyngeal pumping in *Caenorhabditis*  
729 *elegans* depends on tonic and phasic signaling from the nervous system,” *Scientific Reports*, 6(1), p.  
730 22940. doi: 10.1038/srep22940.
- 731 Tsujimura, T. *et al.* (2019) “Involvement of the epithelial sodium channel in initiation of  
732 mechanically evoked swallows in anaesthetized rats,” *Journal of Physiology*, 597(11). doi:  
733 10.1113/JP277895.
- 734 Vidal-Gadea, A. G. *et al.* (2012) “Coordination of behavioral hierarchies during environmental  
735 transitions in *Caenorhabditis elegans*,” *Worm*, 1(1), pp. 5–11. doi: 10.4161/worm.19148.
- 736 Wang, P. *et al.* (2020) “Visceral Mechano-sensing Neurons Control *Drosophila* Feeding by Using  
737 Piezo as a Sensor,” *Neuron*, pp. 1–11. doi: 10.1016/j.neuron.2020.08.017.
- 738 Wang, S. *et al.* (2016) “Endothelial cation channel PIEZO1 controls blood pressure by mediating  
739 flow-induced ATP release,” *Journal of Clinical Investigation*, 126(12), pp. 4527–4536. doi:  
740 10.1172/JCI87343.
- 741 Woo, S.-H. *et al.* (2014) “Piezo2 is required for Merkel-cell mechanotransduction.,” *Nature*,  
742 509(7502), pp. 622–6. doi: 10.1038/nature13251.
- 743 Woo, S.-H. *et al.* (2015) “Piezo2 is the principal mechanotransduction channel for proprioception,”  
744 *Nature Neuroscience*, 18(12), pp. 1756–1762. doi: 10.1038/nn.4162.
- 745 Wu, J., Lewis, A. H. and Grandl, J. (2017) “Touch, Tension, and Transduction – The Function and  
746 Regulation of Piezo Ion Channels,” *Trends in Biochemical Sciences*, 42(1), pp. 57–71. doi:  
747 10.1016/j.tibs.2016.09.004.
- 748 Wu, J. *et al.* (2017) “Inactivation of Mechanically Activated Piezo1 Ion Channels Is Determined by  
749 the C-Terminal Extracellular Domain and the Inner Pore Helix”. *Cell Reports*. 21(9) pp. 2357-2366.  
750 doi: 10.1016/j.celrep.2017.10.120.
- 751 Yamaguchi, T. *et al.* (2019) “PIEZO2 deficiency is a recognizable arthrogryposis syndrome: A new  
752 case and literature review,” *American Journal of Medical Genetics, Part A*, 179(6). doi:  
753 10.1002/ajmg.a.61142.
- 754 Yan, Z. *et al.* (2013) “*Drosophila* NOMPC is a mechanotransduction channel subunit for gentle-  
755 touch sensation.,” *Nature*, 493(7431), pp. 221–5. doi: 10.1038/nature11685.
- 756 Yu, L. *et al.* (2015) “Bacterial respiration and growth rates affect the feeding preferences, brood size  
757 and lifespan of *Caenorhabditis elegans*,” *PLoS ONE*, 10(7), pp. 1–13. doi:  
758 10.1371/journal.pone.0134401.
- 759 Zarychanski, R. *et al.* (2012) “Mutations in the mechanotransduction protein PIEZO1 are associated  
760 with hereditary xerocytosis,” *Blood*, 120(9), pp. 1908–1915. doi: 10.1182/blood-2012-04-422253.
- 761 Zeng, W.-Z. *et al.* (2018) “PIEZOs mediate neuronal sensing of blood pressure and the baroreceptor  
762 reflex.,” *Science (New York, N.Y.)*, 362(6413), pp. 464–467. doi: 10.1126/science.aau6324.
